1 **AMP-activated protein kinase is a key regulator of acute neurovascular**  
2 **permeability**

3

4 **Silvia Dragoni<sup>1</sup>, Bruna Caridi<sup>1</sup>, Eleni Karatsai<sup>2</sup>, Thomas Burgoyne<sup>1</sup>, Mosharraf H. Sarker<sup>1,3</sup>, Patric**  
5 **Turowski<sup>1,4</sup>**

6

7 1. Institute of Ophthalmology, University College London, 11-43 Bath Street, London EC1V 9EL, UK.

8 2. NIHR Moorfields Biomedical Research Centre, Moorfields Eye Hospital, London, UK.

9 3. School of Science, Engineering & Design, Teesside University, Stephenson Street, Middlesbrough  
10 TS1 3BA, UK.

11 4. Corresponding author: p.turowski@ucl.ac.uk

12

13

14 **ABSTRACT**

15 Many neuronal and retinal disorders are associated with pathological  
16 hyperpermeability of the microvasculature. We have used explants of rodent retinae  
17 to measure and manipulate acute neurovascular permeability and signal transduction  
18 to study the role of AMP-activated protein kinase (AMPK). Following stimulation with  
19 either vascular endothelial growth factor (VEGF-A) or bradykinin (BK), AMPK was  
20 rapidly and strongly phosphorylated and acted as a key mediator of permeability  
21 downstream of Ca<sup>2+</sup> and Ca<sup>2+</sup>/calmodulin-dependent protein kinase kinase (CAMKK).  
22 Accordingly, AMPK agonists potently induced acute retinal vascular leakage. AMPK  
23 activation led to phosphorylation of endothelial nitric oxide synthase (eNOS), which in  
24 turn increased VE-cadherin phosphorylation on Y685. In parallel, AMPK also mediated  
25 phosphorylation of p38 MAP kinase and HSP27, indicating that it regulated  
26 paracellular junctions and cellular contractility, both previously associated with  
27 endothelial permeability. Endothelial AMPK provided a missing link in neurovascular

28 permeability, connecting  $\text{Ca}^{2+}$  transients to the activation of eNOS and p38,  
29 irrespective of the permeability-inducing factor used. Collectively, the ex-vivo retina  
30 model was easily accessible and, due to its compatibility with small molecule  
31 antagonists/agonists and siRNA, constitutes a reliable tool to study regulators and  
32 mechanism of neurovascular permeability.

33

#### 34 **KEY WORDS**

35 Neurovascular leakage; AMP-activated protein kinase; VEGF-A, bradykinin; retina

36

37

#### 38 **INTRODUCTION**

39 Leakage within the vascular system can be the cause or a significant co-morbidity of  
40 a variety of pathologies and is the consequence of endothelial hyperpermeability,  
41 which leads to extravasation of fluids and proteins, resulting in interstitial oedema<sup>1</sup>. In  
42 the nervous system, where the vasculature is uniquely impermeable and is referred to  
43 as the blood-brain barrier (BBB), vascular leakage accompanies stroke, multiple  
44 sclerosis, Parkinsons Disease as well as various forms of dementia<sup>2, 3</sup>. Neurovascular  
45 leakage also affects the blood-retinal barrier (BRB), where it is a hallmark feature of  
46 diabetic retinopathy and neovascular age-related macular degeneration<sup>4</sup>. Leakage  
47 during retinopathies is driven by permeability-inducing factors (PIFs), most  
48 prominently by the angiogenic growth factor VEGF-A; and VEGF-A antagonists are  
49 successfully used to reduce oedema and abnormal vessel growth, and restore  
50 neuronal dysfunction<sup>5</sup>. Meta-analysis of the clinical use of anti-VEGFs in diabetic  
51 macular oedema suggests that PIFs other than VEGF-A play an important role in the

52 pathogenesis of retinal leakage disease<sup>6</sup>, including angiopoietin-2<sup>7</sup>, lyso-  
53 phosphatidylcholine<sup>8</sup> and BK<sup>9</sup>.

54 PIFs induce both acute and chronic vascular leakage. For instance, exposure of the  
55 vascular endothelium to VEGF-A leads to acute permeability that usually lasts less  
56 than 30 minutes. If not resolved persistent leakage ensues that chronically impairs  
57 vascular integrity<sup>1, 10</sup>. Different PIFs bind to distinct endothelial cell (EC) surface  
58 receptors, but ultimately all permeability responses involve paracellular junction  
59 modulation or formation of transport vesicles<sup>1, 2</sup>, suggesting that ECs regulate  
60 hyperpermeability through a core molecular machinery and common downstream  
61 signalling. Indeed, e.g. Ca<sup>2+</sup> transients, phosphorylation of the MAP kinase p38 and  
62 enhanced actin contractility are associated with all vascular permeability, as is  
63 activation of eNOS<sup>11,12,13,14</sup>. Adherens and tight junction modulation is associated with  
64 paracellular permeability and the phosphorylation of VE-cadherin (VE-cad) is  
65 associated with acute permeability in the periphery and the retina<sup>15, 16</sup>. In the retina the  
66 phosphorylation of occludin on S490 and its subsequent internalisation also plays an  
67 important role, at least in a more chronic setting<sup>17</sup>. Identifying core signalling, on which  
68 all leakage responses depend, is desirable for therapeutic development as it would  
69 allow treatment without prior knowledge of specific known (or unknown) extracellular  
70 PIF.

71 In the brain and the retina, entirely different signalling is induced by VEGF-A in ECs  
72 when it is added lumenally (from the blood side) or ablumenally (from the tissue side),  
73 with leakage-inducing signalling entirely restricted to abluminal stimulation<sup>12</sup>. For  
74 instance, leakage-associated p38 activation is triggered by abluminal (basal) VEGF-A  
75 stimulation, whilst activation of the PI3K/AKT pathway, which does not mediate  
76 permeability, is only seen following luminal (apical) stimulation. Thus, signalling

77 specific to leakage can be inferred by comparing cellular stimulation following luminal  
78 and abluminal addition of VEGF-A. Conversely, BK efficiently induces permeability  
79 from the basal as well as apical side of cerebral or retinal ECs.

80 AMP-activated protein kinase (AMPK) is a phylogenetically conserved energy sensor  
81 that regulates energy homeostasis by coordinating metabolic pathways and thus  
82 balancing energy requirement with nutrient supply<sup>18</sup>. Previous studies suggest that  
83 AMPK acts as a protector of the BBB integrity, for instance by preventing LPS-  
84 enhanced NAD(P)H oxidase expression in ECs and the consequent barrier  
85 dysfunction and enhanced permeability<sup>19</sup>. Moreover, AMPK mediates up-regulation of  
86 BBB functions induced in vitro by metformin, a drug used for the treatment of  
87 diabetes<sup>20</sup>. Nevertheless, in the retina AMPK activation can lead to the breakdown of  
88 the outer, non-vascular BRB, which is constituted by the retinal pigment epithelium<sup>21</sup>.  
89 However, if and how AMPK contributes to permeability induction by agonists such as  
90 VEGF-A or BK in neural microvessels is unknown.

91 To identify and validate core components mediating acute permeability in  
92 neurovascular ECs, we adopted an ex vivo retinal preparation, originally described for  
93 rats<sup>22</sup>. Development of this method allowed measurement of real time changes of  
94 permeability and signalling in intact BRB vessels from rat and mouse. Importantly, this  
95 model system was compatible with precise pharmacokinetic agonist studies, parallel  
96 IHC staining and manipulation using siRNA. Our workflow can be used to identify core  
97 regulators of CNS endothelial hyperpermeability and was validated by identifying  
98 AMPK as a novel, key regulator linking VEGF-A or BK-induced Ca<sup>2+</sup> transients to  
99 eNOS activation and VE-cad phosphorylation.

100

101

## 102 **MATERIALS AND METHODS**

### 103 **Materials**

104 Recombinant rat VEGF-A (165) was purchased from R&D Systems (Abingdon, United  
105 Kingdom). Bradykinin, Sulforhodamine-B, Evans blue, SU-1498, SB-203580,  
106 Compound-C, STO-609, L-NAME, BAPTA-AM, AICAR and A769662 were purchased  
107 from MERCK (Dorset, United Kingdom). Polyclonal antibodies specific for p38, Hsp27,  
108 AMPK $\alpha$ , eNOS and their phosphorylated forms (p38 Thr180/Tyr182, pHSP27 Ser82,  
109 AMPK Thr172 and eNOS Ser1177) were from Cell Signaling Technology (Beverly,  
110 MA). Polyclonal antibodies against phosphorylated VE-cad (p-Y658-VEC and p-Y685-  
111 VEC) were a gift from E. Dejana (Milan, Italy).

112

### 113 **Animals**

114 Wistar female rats (7-10 weeks old) and C75BL/6J mice (7-12 weeks old) were  
115 purchased from Charles River Laboratories. All animal procedures were performed in  
116 accordance with Animal Welfare Ethical Review Body (AWERB) and Association for  
117 Research in Vision and Ophthalmology (ARVO) Statement for the Use of Animals in  
118 Ophthalmic and Vision Research guidelines and under a UK Home Office licence.

119

### 120 **Methods**

#### 121 **Brain microvascular EC isolation and culture**

122 Microvessels were isolated from rat cortical grey matter by collagenase dispase  
123 digestion and BSA and Percoll density gradient centrifugation<sup>12</sup>. Purified vessels were  
124 seeded onto collagen IV/fibronectin-coated Costar Transwells (Fisher Scientific) at  
125 high density (vessels from 6 rat brains per 40 cm<sup>2</sup>). Cells were grown in EGM2-MV

126 (Lonza), with 5 mg/ml puromycin from the second day for 3 days, for 2–3 weeks until  
127 their TEER plateaued at values above 200  $\Omega$ .cm<sup>2</sup>.

128 The human brain MVEC line hCMEC/D3 was also grown in EGM2-MV as previously  
129 described<sup>23</sup>.

130

### 131 **Transendothelial Electrical Resistance (TEER)**

132 Changes in the TEER were determined by time-resolved impedance spectroscopy of  
133 primary cerebral rat brain microvascular ECs grown on 12 mm Transwells, using a  
134 CellZscope (Nanoanalytics). Before the addition of VEGF-A and BK, TEER values  
135 were 500-800  $\Omega$ .cm<sup>2</sup>.

136

### 137 **Immunocytochemistry**

138 Primary cerebral rat brain microvascular ECs were fixed with methanol (-20°C).  
139 Staining was performed as previously described using antibodies against occludin  
140 (OC-3F10, Invitrogen)<sup>24</sup> or VE-cad<sup>25</sup>.

141

### 142 **Immunogold Electron Microscopy**

143 Cryo-immuno electron microscopy (EM) was performed as previously described<sup>12</sup>.  
144 Briefly, hCMEC/D3 cells were fixed in 4% PFA and 0.1% glutaraldehyde. Sections  
145 were stained using antibodies against the extracellular domain (TEA 1.31; Serotech)  
146 or the C terminus (sc-6458; Santa Cruz) of VE-cad. Image J (NIH) was used to process  
147 images and measure the distance among the gold particles and the interendothelial  
148 junctions.

149

150

## 151 **Retinal explant preparation**

152 Retinal explants were prepared essentially as described before<sup>22</sup>. A Wistar female rats  
153 or C75BL/6J mouse was killed by overdose of CO<sub>2</sub>. The common carotid artery was  
154 carefully exposed and cannulated with a glass microcannula. The head vasculature  
155 was then flushed first with heparinized saline (300U/L heparin in 0.9% NaCl. Mouse:  
156 5 ml; rat: 20 ml), then with stabilizing solution (10 mM Mg<sup>2+</sup>, 110 mM NaCl, 8 mM KCl,  
157 10 mM HEPES, 1 mM CaCl<sub>2</sub>, pH 7.0. 10 μM Isoproterenol to be added before use.  
158 Mouse: 5 ml; rat: 20 ml), also referred to as cardioplegic solution containing  
159 isoproterenol, and finally with the same solution supplemented with 5 g/L Evans blue  
160 dye in 10% albumin (mouse: 5 ml; rat: 20 ml) for subsequent visualisation of the  
161 vasculature. Next, an eye was surgically removed and the retina isolated, together  
162 with the attached sclera. The retina was flattened onto a transparent silicone medium  
163 (SYLGARD® 184 SILICONE ELASTOMER KIT by Dow Corning), kept in position by  
164 a metal ring, and the resulting well sealed by grease. Throughout the procedure the  
165 retina was continuously superfused with Krebs solution (124 mM sodium chloride, 5  
166 mM potassium chloride, 2 mM MgSO<sub>4</sub>, 0.125 mM NaH<sub>2</sub> PO<sub>4</sub>, 22 mM NaHCO<sub>3</sub>, 2 mM  
167 CaCl<sub>2</sub>, pH 7.4. 5 mM glucose and 0.1% BSA to be added before use).

168

## 169 **Permeability measurements**

170 Retinal explants were mounted for visualisation and further experimentation on an  
171 upright Zeiss Axiophot fluorescent microscope. A radial vessel of a superfused retinal  
172 explant was cannulated at ca. 150 μm from the optic nerve using a microinjection  
173 needle (tip diameter 1-5 μm, sharpened to a bevel of < 30°) and the entire retinal  
174 vasculature injected with sulforhodamine-B (1 mg/ml in Krebs solution). Illumination  
175 was switched to fluorescence and the vessels were visualized under a TRITC filter

176 using a Olympus 40X water immersion objective. For permeability measurements a  
177 microvessel was chosen at least 200  $\mu\text{m}$  away from the cannulated radial vessel.  
178 Fluorescent content of the vessel was recorded continuously by time lapse (1 frame/2  
179 s) on a Hamamatsu CCD camera for at least 2 min. A baseline was recorded for ca.  
180 30 s, before VEGF-A or BK (in Krebs solution) was added on the top of the retina.  
181 Time lapse series were analysed using ImageJ. Time-dependent fluorescence  
182 intensity data of the chosen vessel was derived from a square region of interest (ca.  
183 18 x 18 pixels) (Supplemental Figure 1a and b). Fluorescence in the immediate vicinity  
184 of the microvessel was measured and subtracted from the vessel fluorescence  
185 measurements. Pixel intensity measurements were charted against time, and  
186 permeability values were computed by fitting data to the exponential equation  $C_t =$   
187  $C_0 * e^{-kt}$ , where  $k = 4P/d$  and  $d$  is the diameter of the vessel<sup>12</sup>. The difference in  
188 permeability between pre-treatment and post-treatment resulted in the absolute  
189 permeability change associated with the treatment regimen.

190

### 191 **Immunohistochemistry**

192 After dissection, retinae from rat or mouse were fixed with 4% PFA at room  
193 temperature for 1 h. After 30 min of blocking (3% Triton X-100, 1% Tween, 0.5%  
194 Bovine Serum Albumin in 2x PBS), retinae were incubated with primary antibodies  
195 against Isolectin B4 (IB-4), P-p38, P-HSP27, P-eNOS, P-AMPK $\alpha$ , claudin-5 and P-VE-  
196 Cadherin at 4  $^{\circ}\text{C}$  o/n. Retinae were washed and incubated with matching Alexa Fluor  
197 conjugated secondary antibodies at room temperature for 2 h. Finally, retinae were  
198 washed and mounted using Mowiol 4-88 mounting medium (Sigma). More details can  
199 be found in ref 12.

200



201 **siRNA-mediated Knockdown of claudin-5 and AMPK $\alpha$**

202 Specific siRNA sequences targeting claudin-5 or the  $\alpha$  subunit of AMPK were  
203 purchased from Dharmacon (Chicago, IL). Mice were anesthetised by intraperitoneal  
204 injection of 100  $\mu$ l of 6% Narketan (ketamine) and 10% Dormitor (medetomidine) in  
205 sterile water. 2  $\mu$ l of the siRNA (1ng/ml in sterile PBS) were injected intravitreally in  
206 the right eye under a stereomicroscope, using a Hamilton syringe with a 3 degrees  
207 Hamilton RN needle (Esslab). Two microliters of scrambled siRNA were injected into  
208 the left eye as a control. To inject, an initial puncture was made to the superior nasal  
209 sclera, at the level of the pars plana. Then, the tip of the needle was further introduced  
210 through the puncture hole with a 45-degree angle into the vitreous body. Retinae were  
211 isolated 72 h after the injection.

212

213 **Phosphoantibody array**

214 Mature monolayers of primary, unpassaged brain microvascular ECs grown on 24 mm  
215 Costar Transwells were stimulated with VEGF-A (50 ng/ml) from the apical or basal  
216 side for 5 or 30 min. Cells from 2 Transwells were combined by lysis in 200  $\mu$ L of lysis  
217 buffer and subjected to screening using Human Phospho-Kinase Array Proteome  
218 Profiler Array (R&D Systems; ARY003B) exactly according to the manufacturer's  
219 instructions. Arrays were exposed for varying amounts of time to capture signals in the  
220 linear range and quantified by densitometric scanning and ImageJ (NIH). Signals were  
221 normalised using array-internal controls. Results were expressed as fold-differences  
222 between apical versus basal signals.

223

224

225

## 226 **Western Blots**

227 Cell lysates were prepared as previously described<sup>12</sup>. Proteins were separated by  
228 SDS-PAGE and transferred to nitrocellulose by semidry electrotransfer. Membranes  
229 were blocked o/n and then incubated with the appropriate antibody diluted at 1:2,000.  
230 Membranes were washed three times with TBS/0.1% Tween-20 before 1h incubation  
231 with an anti-mouse or anti-rabbit HRP-conjugated IgG (GE Healthcare) at a dilution of  
232 1:10,000 and 1:5,000, respectively. Membranes were developed using the ECL  
233 reagents (Roche) and exposed to X-ray film. Protein bands were evaluated by  
234 densitometric quantification, normalized against the amount of total protein, and  
235 GADPH or Tubulin.

236

## 237 **Statistics**

238 TEER measurements of three independent cell monolayers were combined and  
239 expressed as mean  $\pm$  SD. Significant differences were determined by two ways  
240 ANOVA with replication, with significance levels set at 0,05, followed by post-hoc  
241 Bonferroni's multiple comparison test.

242 Densitometric quantification of four independent immunoblots were determined by  
243 changes in phosphoprotein content normalized to tubulin or GADPH/total protein  
244 loading controls, with values expressed as fold increase. Data were presented as  
245 mean  $\pm$  SD. Statistics were performed using one-way ANOVA with significance levels  
246 set at 0.05, followed by post-hoc Dunnett's tests.

247 Permeability measurements from at least 4 different ex vivo retinae were combined  
248 and expressed as mean  $\pm$  SD. Significant differences were determined via t-test  
249 between the control and each inhibitor.

250 Significance levels were set to \*,  $p < 0.05$ ; \*\*,  $0.001 < p < 0.01$ , \*\*\*,  $p \leq 0.001$ .

251

252 **RESULTS**

253 **VEGF-A and BK-induced permeability and junctional changes in brain**  
254 **microvascular ECs.**

255 Treatment of primary rat brain microvascular ECs with VEGF-A or BK significantly  
256 reduced TEER, indicating that paracellular permeability was induced (Figure 1a and  
257 b). TEER dropped immediately and reached a minimum within less than 5 min after  
258 addition of either VEGF-A or BK before reverting to control levels within 1 h.  
259 Thereafter, another significant, but more modest reduction in TEER was observed,  
260 indicative of a more chronic change in cell monolayer permeability. In order to correlate  
261 TEER changes with paracellular junction breakdown, the distribution of occludin and  
262 VE-Cad was analysed in VEGF-A- and BK-stimulated primary brain microvascular  
263 ECs (Figure 1c). As judged by confocal microscopy, occludin expression and  
264 distribution remained unchanged for up to 2 h of VEGF-A or BK stimulation. VE-cad  
265 levels also remained unchanged, but a broadening of the staining was observed within  
266 5 min of the addition of the PIF, in particular at and around tricellular junctions. In  
267 agreement, cryo-immuno-EM of hCMEC/D3 cells revealed a significant relocation of  
268 VE-cad from the junctions to the cell interior by an average distance of 55 and 66 nm  
269 following a 5-min stimulation with VEGF-A and BK, respectively (Figure 1d-g). These  
270 results showed that single addition of either VEGF-A or BK induced acute and chronic  
271 permeability, and that the acute response was accompanied by VE-cad redistribution  
272 away from the junctions.

273

274

275

## 276 **Validation of a modified ex-vivo retinal model**

277 In order to study the acute phase of VEGF-A- and BK-induced permeability in intact  
278 retinal microvessels in real time, we adopted an ex-vivo retinal model<sup>22</sup>. Permeability  
279 measurements used rat retinal explants, in which the vasculature was stabilised with  
280 a cardioplegic solution. To assess if the ex vivo preparation and perfusions led to  
281 alterations of the retinal vasculature and to determine stability of the preparation, we  
282 compared directly perfused fixed retinae with others, perfused with cardioplegic  
283 solution and left under superfusion with Krebs solution for 1 h before fixation.  
284 Subsequent whole mount staining for the tight junction protein claudin-5 and the  
285 adherens junction protein VE-cad revealed characteristic strands of continuous  
286 paracellular staining (Figure 2a, b) in both preparations. Importantly, the staining  
287 pattern was indistinguishable between the two different preparations, indicating that  
288 the perfusion did not cause significant disturbances of endothelial junctions.  
289 Permeability measurements were carried out by monitoring sulforhodamine B loss  
290 from individual microvessels (Supplemental Figure 1a, b). Baseline permeability to  
291 sulforhodamine-B was very low and on average  $0.2 \pm 0.16 \times 10^{-6}$  cm/s. Taken together  
292 these data showed that morphological and barrier properties of the retinal  
293 microvasculature were well preserved in these preparations.  
294 Stimulation of the ex-vivo retina with VEGF-A or BK induced an immediate, marked  
295 loss of sulforhodamine B from the microvessel lumen, which was similar for both  
296 stimuli and amounted to a ca. 3-fold increase in microvessel permeability (Figures 2c-  
297 f). Preincubation of the ex-vivo retina with VEGFR2 inhibitor SU-1498 for 15 min  
298 prevented VEGF-A- but not BK-induced permeability, confirming the role of VEGFR2  
299 in VEGF-A-induced permeability and indicating that BK acted through a different  
300 receptor. Whole mount retinal staining showed that VEGF-A- and BK-induced

301 permeability coincided with the phosphorylation of p38 on T180/Y182, its downstream  
302 effector HSP27 (on S82), as well as eNOS (on S1177) (Figure 2g, h). Phosphorylation  
303 of all three downstream effectors in response to VEGF-A but not BK was abolished  
304 following preincubation with SU-1498.

305 This experimental model was also used for mouse retinae. Baseline permeability in  
306 mouse preparations was  $0.15 \pm 0.1 \times 10^{-6}$  cm/s. VEGF-A stimulation increased  
307 permeability to  $0.65 \pm 0.2 \times 10^{-6}$  cm/s, and this was again sensitive to SU-1498 (Figure  
308 2i). Furthermore, we observed SU-1498-sensitive phosphorylation of p38, HSP27 and  
309 eNOS in mouse retinal microvessels within 2 min of VEGF-A stimulation (Figure 2j).  
310 To assess the compatibility of the ex vivo retina with knockdown technology, mouse  
311 eyes were injected intravitreally with siRNA against CLDN5. Western blot analysis  
312 of retinal lysates, harvested 72 h after the injection, showed that CLDN5 expression  
313 was significantly reduced by 65% (Supplemental Figure 1c, d) and this was  
314 corroborated by whole mount staining of the retina (Supplemental Figure 1e).  
315 Microvessel permeability following knock-down of CLDN5 increased ca. 3-fold (to  
316  $0.41 \pm 0.03$  cm/s) (Supplemental Figure 1f, g). Taken together, these results  
317 demonstrated that the ex-vivo retinal preparation was a reliable model to measure  
318 retinal paracellular microvessel permeability in rats and mice.

319

### 320 **VEGF-A and Bradykinin induce AMPK phosphorylation**

321 In order to find new regulators of permeability, primary rat brain microvascular ECs  
322 were stimulated for 5 or 30 min with VEGF-A (50 ng/ml) from either the apical (non-  
323 permeability inducing) or basal (permeability-inducing) side (Figure 3a) and cell  
324 lysates analysed by a phospho-protein antibody array. In response to VEGF-A

325 stimulation many signalling components were phosphorylated, as exemplified by p38,  
326 HSP27, AMPK, eNOS, SRC, ERK and AKT (Figure 3b, c).

327 Differentially phosphorylated proteins were categorised into three groups; group I  
328 phosphorylated only after basal stimulation with VEGF-A (such as p38, HSP27 and  
329 AMPK), group II phosphorylated regardless of the side of the stimulation (such as  
330 eNOS, SRC and ERK) and group III phosphorylated only when VEGF-A was applied  
331 apically (such as AKT). Phosphorylation of proteins exclusively in response to basally  
332 applied VEGF-A suggested they played a role in hyperpermeability (group I). Among  
333 these, AMPK stood out as its role in acute endothelial hyperpermeability has not yet  
334 been studied in detail. Additionally, AMPK was also among the 10 proteins, for which  
335 phosphorylation increased the most in response to basally applied VEGF-A, when  
336 analysed by phospho-peptide mass spectrometry (Dragoni and Turowski, unpublished  
337 results). A previous study also demonstrates that AMPK link  $Ca^{2+}$  transients to VE-cad  
338 phosphorylation in response to ICAM-1 engagement in brain microvascular ECs<sup>26</sup>.

339 AMPK phosphorylation in response to VEGF-A was confirmed by Western blot  
340 analysis. Stimulation of primary rat brain ECs from the basal side led to rapid, transient  
341 phosphorylation of AMPK $\alpha$  on T172, which peaked after ca. 2 min (Figure 3d). A very  
342 similar activation pattern was observed in the intact rat retina when VEGF-A was  
343 applied directly to the top of the isolated retina (corresponding to the basal side of the  
344 endothelium) (Figure 3e). BK induced similar phosphorylation of AMPK $\alpha$  T172, both  
345 in the cultured primary brain microvascular ECs and intact retina (Figure 3f, g). It was  
346 notable that AMPK phosphorylation was maximal after around 2 min in response to  
347 both VEGF-A and BK. However, BK clearly induced more sustained phosphorylation.

348

349

350 **AMPK mediates VEGF-A/Bradykinin-induced permeability**

351 In order to specify the role of AMPK during VEGF-A- and BK-induced vascular  
352 permeability, AMPK activity was neutralised in the ex vivo retina. Preincubation of the  
353 ex-vivo retina with compound C, a widely used AMPK antagonist, significantly  
354 decreased VEGF-A- and BK- induced permeability by 80% and 93%, respectively  
355 (Figure 4a-d). Moreover, whole mount staining showed that pre-treatment with  
356 compound C prevented the VEGF-A- and BK-induced activation of p38, HSP27 and  
357 eNOS (Figure 4e, f).

358 Next AMPK $\alpha$  was knocked down specifically by intravitreal injection of siRNA 72 h  
359 prior to preparing the retinae for ex vivo permeability measurements. Western blot  
360 results showed that AMPK $\alpha$  protein expression was significantly reduced by 70%  
361 (Figures 4g, h). Neither VEGF-A nor BK stimulation led to significant permeability in  
362 AMPK knocked-down retinae (Figures 4i-l).

363 Finally, when AMPK was directly activated by treating ex-vivo retinae with A769662 or  
364 AICAR, specific AMPK agonists that directly bind to and activate AMPK without any  
365 significant change in cellular ATP, ADP or AMP levels, baseline permeability was  
366 induced (Figure 5a-d) as well as the phosphorylation of AMPK, p38, HSP27 and eNOS  
367 (Figure 5e). Taken together these results confirmed the central role of AMPK in VEGF-  
368 A- and BK-induced acute retinal leakage and showed that AMPK acted upstream of  
369 p38 and eNOS.

370

371 **VEGF-A- and BK-induced permeability requires Ca<sup>2+</sup> and CAMKK, p38 and eNOS**

372 Next, we aimed at placing AMPK within established PIF signalling cascades. Ca<sup>2+</sup> is  
373 critical for the activation of both p38 and eNOS<sup>26, 27,28</sup>. To test its role in VEGF-A-  
374 induced vascular leakage the ex-vivo retina was incubated with BAPTA, a

375 Ca<sup>2+</sup>chelant, prior to VEGF-A administration. BAPTA treatment significantly reduced  
376 VEGF-A-induced permeability by 94%, and also prevented the phosphorylation of p38,  
377 Hsp27 and eNOS (Figures 6a, e), suggesting that Ca<sup>2+</sup> acted upstream to these  
378 molecules. CAMKK is able to phosphorylate and activate AMPK in a Ca<sup>2+</sup>-dependent  
379 manner<sup>26, 29</sup>. Treatment of retinæ with the CAMKK inhibitor STO-609 significantly  
380 reduced VEGF-A-induced permeability by 86% and also prevented the activation of  
381 p38, Hsp27 and eNOS (Figure 6b, e). The role of eNOS in permeability was re-  
382 confirmed by preincubation of the ex-vivo retinæ with L-NAME, which reduced VEGF-  
383 A-induced permeability by 87% but it did not have any effect on p38 or HSP27  
384 phosphorylation (Figure 6c, e), indicating that eNOS was not upstream of p38. Finally,  
385 the ex-vivo retina was preincubated with the p38 inhibitor SB203580, which  
386 significantly reduced the VEGF-A-induced permeability by 80% as well as activation  
387 of Hsp27 but not of eNOS (Figure 6d, e).

388 Similar results were obtained for BK-induced stimulation of retinæ. BAPTA or STO  
389 nearly completely abolished BK-induced permeability, together with the activation of  
390 p38, Hsp27 and eNOS (Figure 6f, g, j). Pre-treatment of the ex-vivo retina with L-  
391 NAME reduced BK-induced permeability by 67% but did not affect p38 or HSP27  
392 phosphorylation (Figure 6h, j). Finally, SB203580 prevented BK-induced permeability  
393 as well as phosphorylation of HSP27 but not eNOS (Figure 6i, j).

394 Importantly, VEGF-A- or BK-induced phosphorylation of AMPK $\alpha$  was completely  
395 abolished by BAPTA or STO. VEGF-A- but not BK-induced AMPK $\alpha$  phosphorylation  
396 was also abolished by SU1498 (Figure 7a). These results indicated that in the retina,  
397 VEGF-A and BK induced Ca<sup>2+</sup> transients and consequent activation of CAMKK and  
398 AMPK. At this point signalling diverged into either activation of p38 or eNOS, which  
399 both contributed to permeability (Figure 7c).



400

### 401 **VEGF-A and BK stimulate VE-Cadherin phosphorylation**

402 Lastly, we wanted to analyse VE-cad internalisation in the VEGF-A and BK stimulated  
403 ex vivo retina. However, systematic correlation of cryo-immuno EM to leaky  
404 microvessels proved impractical. We therefore used phosphorylation of VE-cad on  
405 Y685 as a surrogate marker for retinal microvessel permeability<sup>16</sup>, in particular since  
406 such VE-cad phosphorylation is also a prerequisite for internalisation after BK  
407 treatment<sup>15</sup>. VEGF-A or BK stimulation of ex vivo retinae induced tyrosine  
408 phosphorylation of VE-cad on Y685 in intact microvessels (Figure 7b). This  
409 phosphorylation was completely abolished following pre-incubation with compound C,  
410 L-NAME but not SB203580, indicating that VE-cad was downstream of AMPK/eNOS  
411 but not AMPK/p38 (Figure 7c).

412

### 413 **DISCUSSION**

414 Measuring retinal microvascular permeability has been mainly restricted to Miles-type  
415 assays using either fluorescent tracers or Evans Blue/albumin<sup>8, 30</sup>. Chronic leakage  
416 can also be visualised in real time by fluorescein angiography<sup>31</sup>. However, collectively  
417 these methods, which measure the amount of extravasated tracer, do not only reflect  
418 the degree of leakage but are also strongly influenced by dye concentration in the  
419 vasculature and dye clearance from the tissue<sup>1, 2</sup>. Further disadvantages of these  
420 methods are that compound concentrations and timing cannot be controlled  
421 accurately. Thus, they are inadequate to measure acute permeability and associated  
422 signalling accurately and in a controlled manner.

423 The ex-vivo retinal platform described herein addressed most of these issues. It  
424 constituted a significant advance to EC cultures, since it used a complete and intact

425 neurovascular unit. The functionality of the retinal vasculature was preserved, with  
426 both VE-cad and claudin-5 distribution indistinguishable from that in vivo. Similar  
427 preparations of the brain and the retina also display full cellular functionality of e.g.  
428 pericytes<sup>32</sup>. Importantly, permeability to sulforhodamine-B was very low and within the  
429 range of that of other small non-ionic molecules at the intact BBB in vivo<sup>33</sup> and notably  
430 ca. 10 x lower than in preparations of pial microvessels<sup>34</sup>, indicating that this model  
431 was highly suitable for permeability measurement at an intact neurovascular unit.  
432 Vascular barrier properties in these retinal explants was, as expected, dependent on  
433 tight junction integrity. The reported speed, at which compounds such as VEGF-A  
434 induce permeability<sup>10</sup>, was fully recapitulated. Leakage measurements were then  
435 combined with whole tissue staining and analyses of the phosphorylation status of key  
436 mediators of permeability using phospho-specific antibodies to gain mechanistic  
437 insight. Furthermore, the preparations could be interrogated using small molecule  
438 antagonists and agonists at defined concentrations and times, and allowed for the  
439 identification of key downstream regulators, common to both VEGF-A and BK  
440 stimulation. Even more specific neutralisation of key proteins was achieved through  
441 prior intraocular injection of siRNA. Conceivably this model is compatible for use with  
442 genetically modified mice and disease models, further broadening its applicability. The  
443 ex vivo platform could also be used to measure Ca<sup>2+</sup> transients or localised production  
444 of reactive oxygen or nitrogen species in response to vasoactive compounds such as  
445 VEGF-A or BK.

446 Measurements in retinae were done ex vivo, in the absence of blood flow. Blood flow  
447 and associated shear stress may influence EC biology, such as cell-cell adhesion and  
448 inflammatory dysfunction<sup>15, 35, 36</sup> and their absence in our preparation must be taken  
449 into account when evaluating results. However, it should also be noted that

450 permeability regulation by shear stress appears to be remembered in ECs in vitro for  
451 at least 24 h<sup>37</sup>.

452 For the purpose of developing and validating the ex vivo retinal platform we have  
453 focused on PIFs, which induce permeability when added to the abluminal (tissue) side  
454 of the endothelium, such as VEGF-A and BK<sup>12</sup>, as these are readily applied on top of  
455 the retinal explants. Other PIFs that act only from the luminal side, such as  
456 lysophosphatidic acid<sup>12</sup> or lysophosphatidylcholine<sup>8</sup>, could also potentially be  
457 investigated in this system. However, this would require the use of a manifold injection  
458 system<sup>38</sup>, which allows switching between injection of sulforhodamine-B with or  
459 without permeability factor into radial vessels.

460 VEGF-A and BK induced acute leakage in retinal microvessels, which was associated  
461 with and dependent on Ca<sup>2+</sup>, the MAPK p38 and eNOS, in agreement with published  
462 data<sup>11, 12, 14</sup>. We also identified AMPK as a novel key mediator of both VEGF-A- and  
463 BK-induced permeability, indicating it is a core regulator of acute vascular  
464 permeability. AMPK is primarily known to regulate energy requirements of the cell,  
465 but has also been implicated in other seemingly unrelated cellular processes such as  
466 migration, cell growth and apoptosis<sup>39</sup>. This protein kinase has been studied before in  
467 relation to its protective role of the BBB<sup>19, 20</sup>, whereas in the retinal pigment epithelium  
468 it has been shown to be responsible for the permeability induced by IL-1 $\beta$ <sup>21</sup>. However,  
469 all these studies address chronic changes and do not focus on the role of AMPK for  
470 acute permeability. Whilst its canonical activation is dependent on cellular AMP: ATP  
471 concentrations and phosphorylation on T172 by LKB1, we found that, in the regulation  
472 of endothelial permeability, AMPK was activated downstream of Ca<sup>2+</sup> and CAMKK.  
473 This activation pathway has previously been described as non-canonical<sup>40</sup> and is also  
474 operational when CNS ECs facilitate the transmigration of lymphocytes<sup>26</sup>. Notably,

475 VEGF-A has also been reported before to induce NO production via a pathway  
476 requiring  $\text{Ca}^{2+}$  and AMPK<sup>41</sup>. Indeed, eNOS phosphorylation on S1177 can be  
477 mediated by AKT<sup>42</sup> or AMPK<sup>26, 43</sup>. However, the PI3K/Akt pathway is not relevant to  
478 VEGF-A-induced permeability induction in neurovascular ECs<sup>12</sup>. We confirmed the  
479 phosphorylation of eNOS on S1177 downstream of AMPK both during VEGF-A and  
480 BK permeability induction. Interestingly, the  $\text{Ca}^{2+}$ /AMPK/eNOS pathway resulted in the  
481 phosphorylation of VE-cad on Y685, identified previously as key for vascular  
482 permeability in the periphery<sup>15</sup> and the retina<sup>16</sup>, thus providing a direct link between  
483 AMPK and paracellular junction regulation. For retinal permeability, occludin  
484 phosphorylation and internalisation also plays an important role. However, judging  
485 from the published time courses, it is likely to be a later event, not captured by our  
486 experiments, and thus either secondary to VE-cad phosphorylation or, with its  
487 dependency on PKC $\beta$  activation, outside of the signalling network we have  
488 investigated here<sup>17</sup>.

489 In response to VEGF-A and BK, AMPK also regulated the phosphorylation of the  
490 MAPK p38 and its substrate HSP27, both previously implicated in actin rearrangement  
491 during endothelial barrier disruption<sup>44, 45</sup>. P38 is a bona fide regulator of VEGF-A  
492 responses<sup>46</sup> and its activation downstream of cdc42 and PAK and subsequent  
493 modulation of the actin cytoskeleton occurs during VEGF-A-induced endothelial  
494 migration downstream of VEGFR2 phosphorylation on Y1214<sup>47</sup>. Whilst it is possible  
495 that additional, parallel AMPK regulation of this cascade was operational during  
496 VEGF-A or BK-induced permeability, we favour an alternative model of direct  
497 activation of p38 by AMPK via TAB1, a pathway described in apoptotic lymphocytes  
498 and the ischemic heart<sup>48, 49</sup>. By switching between two different p38 activation modes

499 (Ca<sup>2+</sup>/AMPK/TAB1 versus cdc42/PAK) ECs could adapt cytoskeletal regulation to the  
500 specific requirement of EC migration or permeability.

501 The ex-vivo retina proved to be a reliable model and demonstrated its usefulness in  
502 identifying key regulators of acute permeability. Whilst AMPK clearly emerged as such  
503 a key regulator, it is unlikely to be exploitable as a target for anti-leakage treatments:  
504 its central role in regulating cellular energy demands throughout the body hints at  
505 many potential side effects. Activation of AMPK is currently investigated as a  
506 therapeutic option to treat cancer, metabolic syndrome and diabetes<sup>50, 51</sup>. However, in  
507 light of the strong induction of permeability we observed in response to at least two  
508 AMPK agonists, we propose that these avenues should be explored cautiously, since  
509 at least acute microvascular leakage may accompany such treatment modalities.  
510 Nevertheless, our data collectively indicated that the ex vivo retina platform can play  
511 an important part in elucidating mechanisms and signalling of neurovascular leakage.

512

### 513 **ACKNOWLEDGEMENTS**

514 We thank Dr Paul Fraser (King's College London) for introducing us to his early ex-  
515 vivo retinal preparations and Prof. John Greenwood (UCL) for critical comments on  
516 the manuscript. siRNAs targeting CLDN5 were kindly provided by Dr Matthew  
517 Campbell (Trinity College Dublin). Phospho-VE-Cad antibodies were kindly provided  
518 by Dr Fabrizio Orsenigo and Prof. Elisabetta Dejana (FIRC Institute of Molecular  
519 Oncology, Milan and Uppsala University).

520 This work was supported by a Moorfields Eye Charity grant to S.D. and a Diabetes  
521 UK grant to P.T.

522

523 The data that support the findings of this study are available from the corresponding  
524 author upon reasonable request.

525

526 Supplemental material for this paper can be found at the journal website:

527 [https://eur01.safelinks.protection.outlook.com/?url=http%3A%2F%2Fjournals.sagepub.com%](https://eur01.safelinks.protection.outlook.com/?url=http%3A%2F%2Fjournals.sagepub.com%2Fhome%2Fjcb&data=02%7C01%7C%7C%7C27df537f41f419d715808d795e9c351%7C1faf88fea9984c5b93c9210a11d9a5c2%7C0%7C0%7C637142703553285613&sdata=J8jD0hoMtCdGE1jbrGR5QDN1QGWyjbw0hnEBOenTqj0%3D&reserved=0)

528 [2Fhome%2Fjcb&data=02%7C01%7C%7C%7C27df537f41f419d715808d795e9c351%7C1faf](https://eur01.safelinks.protection.outlook.com/?url=http%3A%2F%2Fjournals.sagepub.com%2Fhome%2Fjcb&data=02%7C01%7C%7C%7C27df537f41f419d715808d795e9c351%7C1faf88fea9984c5b93c9210a11d9a5c2%7C0%7C0%7C637142703553285613&sdata=J8jD0hoMtCdGE1jbrGR5QDN1QGWyjbw0hnEBOenTqj0%3D&reserved=0)

529 [88fea9984c5b93c9210a11d9a5c2%7C0%7C0%7C637142703553285613&sdata=J8jD0ho](https://eur01.safelinks.protection.outlook.com/?url=http%3A%2F%2Fjournals.sagepub.com%2Fhome%2Fjcb&data=02%7C01%7C%7C%7C27df537f41f419d715808d795e9c351%7C1faf88fea9984c5b93c9210a11d9a5c2%7C0%7C0%7C637142703553285613&sdata=J8jD0hoMtCdGE1jbrGR5QDN1QGWyjbw0hnEBOenTqj0%3D&reserved=0)

530 [MtCdGE1jbrGR5QDN1QGWyjbw0hnEBOenTqj0%3D&reserved=0](https://eur01.safelinks.protection.outlook.com/?url=http%3A%2F%2Fjournals.sagepub.com%2Fhome%2Fjcb&data=02%7C01%7C%7C%7C27df537f41f419d715808d795e9c351%7C1faf88fea9984c5b93c9210a11d9a5c2%7C0%7C0%7C637142703553285613&sdata=J8jD0hoMtCdGE1jbrGR5QDN1QGWyjbw0hnEBOenTqj0%3D&reserved=0)

531

532

### 533 **AUTHOR CONTRIBUTION STATEMENT**

534 S.D.: designed experiments; performed experiments; analysed the data; wrote the  
535 manuscript

536 B.C.; E.K.; T.B; M.H.S.: performed experiments

537 P.T.: designed experiments; performed experiments; analysed the data; wrote the  
538 manuscript

### 539 **DISCLOSURE/CONFLICT OF INTEREST**

540 None.

541

542

### 543 **REFERENCES**

544

- 545 1. Nagy JA, Benjamin L, Zeng H, et al. Vascular permeability, vascular hyperpermeability and  
546 angiogenesis. *Angiogenesis* 2008; 11: 109-119. 2008/02/23. DOI: 10.1007/s10456-008-9099-z.
- 547 2. Turowski P. Leakage at Blood-Neural Barriers. In: Link S (ed) *The Blood Brain Barrier and*  
548 *Inflammation*. 2017, pp.81-102.
- 549 3. Sweeney MD, Zhao Z, Montagne A, et al. Blood-Brain Barrier: From Physiology to Disease and  
550 Back. *Physiol Rev* 2019; 99: 21-78. 2018/10/04. DOI: 10.1152/physrev.00050.2017.

- 551 4. Klaassen I, Van Noorden CJ and Schlingemann RO. Molecular basis of the inner blood-retinal  
552 barrier and its breakdown in diabetic macular edema and other pathological conditions. *Prog Retin*  
553 *Eye Res* 2013; 34: 19-48. 2013/02/19. DOI: 10.1016/j.preteyeres.2013.02.001.
- 554 5. Brown DM, Nguyen QD, Marcus DM, et al. Long-term outcomes of ranibizumab therapy for  
555 diabetic macular edema: the 36-month results from two phase III trials: RISE and RIDE. *Ophthalmology*  
556 2013; 120: 2013-2022. 2013/05/28. DOI: 10.1016/j.opthta.2013.02.034.
- 557 6. Ford JA, Lois N, Royle P, et al. Current treatments in diabetic macular oedema: systematic  
558 review and meta-analysis. *BMJ Open* 2013; 3 2013/03/05. DOI: 10.1136/bmjopen-2012-002269.
- 559 7. Campochiaro PA and Peters KG. Targeting Tie2 for Treatment of Diabetic Retinopathy and  
560 Diabetic Macular Edema. *Curr Diab Rep* 2016; 16: 126. 2016/10/26. DOI: 10.1007/s11892-016-0816-  
561 5.
- 562 8. Canning P, Kenny BA, Prise V, et al. Lipoprotein-associated phospholipase A2 (Lp-PLA2) as a  
563 therapeutic target to prevent retinal vasopermeability during diabetes. *Proc Natl Acad Sci U S A* 2016;  
564 113: 7213-7218. 2016/06/15. DOI: 10.1073/pnas.1514213113.
- 565 9. Kita T, Clermont AC, Murugesan N, et al. Plasma Kallikrein-Kinin System as a VEGF-  
566 Independent Mediator of Diabetic Macular Edema. *Diabetes* 2015; 64: 3588-3599. 2015/05/17. DOI:  
567 10.2337/db15-0317.
- 568 10. Bates DO. Vascular endothelial growth factors and vascular permeability. *Cardiovasc Res*  
569 2010; 87: 262-271. 2010/04/20. DOI: 10.1093/cvr/cvq105.
- 570 11. Wu HM, Yuan Y, Zawieja DC, et al. Role of phospholipase C, protein kinase C, and calcium in  
571 VEGF-induced venular hyperpermeability. *Am J Physiol* 1999; 276: H535-542. 1999/02/10. DOI:  
572 10.1152/ajpheart.1999.276.2.H535.
- 573 12. Hudson N, Powner MB, Sarker MH, et al. Differential apicobasal VEGF signaling at vascular  
574 blood-neural barriers. *Dev Cell* 2014; 30: 541-552. 2014/09/02. DOI: 10.1016/j.devcel.2014.06.027.
- 575 13. Weidert E, Pohler SE, Gomez EW, et al. Actinomyosin contraction, phosphorylation of VE-  
576 cadherin, and actin remodeling enable melanoma-induced endothelial cell-cell junction disassembly.  
577 *PLoS One* 2014; 9: e108092. 2014/09/17. DOI: 10.1371/journal.pone.0108092.
- 578 14. Di Lorenzo A, Lin MI, Murata T, et al. eNOS-derived nitric oxide regulates endothelial barrier  
579 function through VE-cadherin and Rho GTPases. *J Cell Sci* 2013; 126: 5541-5552. 2013/09/21. DOI:  
580 10.1242/jcs.115972.
- 581 15. Orsenigo F, Giampietro C, Ferrari A, et al. Phosphorylation of VE-cadherin is modulated by  
582 haemodynamic forces and contributes to the regulation of vascular permeability in vivo. *Nat Commun*  
583 2012; 3: 1208. 2012/11/22. DOI: 10.1038/ncomms2199.
- 584 16. Smith RO, Ninchoji T, Gordon E, et al. Vascular permeability in retinopathy is regulated by  
585 VEGFR2 Y949 signaling to VE-cadherin. *Elife* 2020; 9 2020/04/22. DOI: 10.7554/eLife.54056.
- 586 17. Murakami T, Frey T, Lin C, et al. Protein kinase cbeta phosphorylates occludin regulating tight  
587 junction trafficking in vascular endothelial growth factor-induced permeability in vivo. *Diabetes* 2012;  
588 61: 1573-1583. 2012/03/23. DOI: 10.2337/db11-1367.
- 589 18. Hardie DG. Keeping the home fires burning: AMP-activated protein kinase. *J R Soc Interface*  
590 2018; 15 2018/01/19. DOI: 10.1098/rsif.2017.0774.
- 591 19. Zhao Z, Hu J, Gao X, et al. Activation of AMPK attenuates lipopolysaccharide-impaired integrity  
592 and function of blood-brain barrier in human brain microvascular endothelial cells. *Exp Mol Pathol*  
593 2014; 97: 386-392. 2014/09/16. DOI: 10.1016/j.yexmp.2014.09.006.
- 594 20. Takata F, Dohgu S, Matsumoto J, et al. Metformin induces up-regulation of blood-brain barrier  
595 functions by activating AMP-activated protein kinase in rat brain microvascular endothelial cells.  
596 *Biochem Biophys Res Commun* 2013; 433: 586-590. 2013/03/26. DOI: 10.1016/j.bbrc.2013.03.036.
- 597 21. Villarroel M, Garcia-Ramirez M, Corraliza L, et al. Fenofibric acid prevents retinal pigment  
598 epithelium disruption induced by interleukin-1beta by suppressing AMP-activated protein kinase  
599 (AMPK) activation. *Diabetologia* 2011; 54: 1543-1553. 2011/03/04. DOI: 10.1007/s00125-011-2089-5.

- 600 22. Warboys CM, Toh HB and Fraser PA. Role of NADPH oxidase in retinal microvascular  
601 permeability increase by RAGE activation. *Invest Ophthalmol Vis Sci* 2009; 50: 1319-1328. 2008/11/11.  
602 DOI: 10.1167/iovs.08-2730.
- 603 23. Weksler B. B. SEA, Perrière N., Charneau P., Holloway K., Leveque M., Tricoire-Leignel H.,  
604 Nicotra A., Bourdoulous S, Turowski P., Male D. k., Roux F., Greenwood J., Romero I. A., and Couraud  
605 P. O. Blood-brain barrier-specific properties of a human adult brain endothelial cell line. *FASEB J* 2005;  
606 19: 1872–1874.
- 607 24. Turowski P, Adamson P, Sathia J, et al. Basement membrane-dependent modification of  
608 phenotype and gene expression in human retinal pigment epithelial ARPE-19 cells. *Invest Ophthalmol*  
609 *Vis Sci* 2004; 45: 2786-2794. 2004/07/28. DOI: 10.1167/iovs.03-0943.
- 610 25. Martins T, Burgoyne T, Kenny BA, et al. Methamphetamine-induced nitric oxide promotes  
611 vesicular transport in blood-brain barrier endothelial cells. *Neuropharmacology* 2013; 65: 74-82.  
612 2012/09/11. DOI: 10.1016/j.neuropharm.2012.08.021.
- 613 26. Martinelli R, Gegg M, Longbottom R, et al. ICAM-1-mediated endothelial nitric oxide synthase  
614 activation via calcium and AMP-activated protein kinase is required for transendothelial lymphocyte  
615 migration. *Mol Biol Cell* 2009; 20: 995-1005. 2008/12/17. DOI: 10.1091/mbc.E08-06-0636.
- 616 27. Takeda K, Matsuzawa A, Nishitoh H, et al. Involvement of ASK1 in Ca<sup>2+</sup>-induced p38 MAP  
617 kinase activation. *EMBO Rep* 2004; 5: 161-166. 2004/01/30. DOI: 10.1038/sj.embor.7400072.
- 618 28. da Silva CG, Specht A, Wegiel B, et al. Mechanism of purinergic activation of endothelial nitric  
619 oxide synthase in endothelial cells. *Circulation* 2009; 119: 871-879. 2009/02/04. DOI:  
620 10.1161/CIRCULATIONAHA.108.764571.
- 621 29. Hurley RL, Anderson KA, Franzone JM, et al. The Ca<sup>2+</sup>/calmodulin-dependent protein kinase  
622 kinases are AMP-activated protein kinase kinases. *J Biol Chem* 2005; 280: 29060-29066. 2005/06/28.  
623 DOI: 10.1074/jbc.M503824200.
- 624 30. Radu M and Chernoff J. An in vivo assay to test blood vessel permeability. *J Vis Exp* 2013:  
625 e50062. 2013/03/26. DOI: 10.3791/50062.
- 626 31. Couturier A, Rey PA, Erginay A, et al. Widefield OCT-Angiography and Fluorescein Angiography  
627 Assessments of Nonperfusion in Diabetic Retinopathy and Edema Treated with Anti-Vascular  
628 Endothelial Growth Factor. *Ophthalmology* 2019 2019/08/07. DOI: 10.1016/j.ophtha.2019.06.022.
- 629 32. Mishra A, O'Farrell FM, Reynell C, et al. Imaging pericytes and capillary diameter in brain slices  
630 and isolated retinæ. *Nat Protoc* 2014; 9: 323-336. 2014/01/18. DOI: 10.1038/nprot.2014.019.
- 631 33. Shi L, Zeng M, Sun Y, et al. Quantification of blood-brain barrier solute permeability and brain  
632 transport by multiphoton microscopy. *J Biomech Eng* 2014; 136: 031005. 2013/11/07. DOI:  
633 10.1115/1.4025892.
- 634 34. Easton AS, Sarker MH and Fraser PA. Two components of blood-brain barrier disruption in the  
635 rat. *J Physiol* 1997; 503 ( Pt 3): 613-623. 1997/10/23. DOI: 10.1111/j.1469-7793.1997.613bg.x.
- 636 35. Chistiakov DA, Orekhov AN and Bobryshev YV. Effects of shear stress on endothelial cells: go  
637 with the flow. *Acta Physiol (Oxf)* 2017; 219: 382-408. 2016/06/02. DOI: 10.1111/apha.12725.
- 638 36. Ho RX, Tahboub R, Amraei R, et al. The cell adhesion molecule IGPR-1 is activated by, and  
639 regulates responses of endothelial cells to shear stress. *J Biol Chem* 2019 2019/07/26. DOI:  
640 10.1074/jbc.RA119.008548.
- 641 37. Walsh TG, Murphy RP, Fitzpatrick P, et al. Stabilization of brain microvascular endothelial  
642 barrier function by shear stress involves VE-cadherin signaling leading to modulation of pTyr-occludin  
643 levels. *J Cell Physiol* 2011; 226: 3053-3063. 2011/02/09. DOI: 10.1002/jcp.22655.
- 644 38. Liu B, Shao Y and Mirkin MV. Dual-pipet techniques for probing ionic reactions. *Anal Chem*  
645 2000; 72: 510-519. 2000/03/01. DOI: 10.1021/ac990771p.
- 646 39. Hardie DG. AMP-activated protein kinase: an energy sensor that regulates all aspects of cell  
647 function. *Genes Dev* 2011; 25: 1895-1908. 2011/09/23. DOI: 10.1101/gad.17420111.
- 648 40. Carling D, Sanders MJ and Woods A. The regulation of AMP-activated protein kinase by  
649 upstream kinases. *Int J Obes (Lond)* 2008; 32 Suppl 4: S55-59. 2008/09/18. DOI: 10.1038/ijo.2008.124.



- 650 41. Reihill JA, Ewart MA, Hardie DG, et al. AMP-activated protein kinase mediates VEGF-  
651 stimulated endothelial NO production. *Biochem Biophys Res Commun* 2007; 354: 1084-1088.  
652 2007/02/06. DOI: 10.1016/j.bbrc.2007.01.110.
- 653 42. Fulton D, Gratton JP, McCabe TJ, et al. Regulation of endothelium-derived nitric oxide  
654 production by the protein kinase Akt. *Nature* 1999; 399: 597-601. 1999/06/22. DOI: 10.1038/21218.
- 655 43. Youn JY, Wang T and Cai H. An ezrin/calpain/PI3K/AMPK/eNOSs1179 signaling cascade  
656 mediating VEGF-dependent endothelial nitric oxide production. *Circ Res* 2009; 104: 50-59.  
657 2008/11/29. DOI: 10.1161/CIRCRESAHA.108.178467.
- 658 44. Sawada J, Li F and Komatsu M. R-Ras Inhibits VEGF-Induced p38MAPK Activation and HSP27  
659 Phosphorylation in Endothelial Cells. *J Vasc Res* 2015; 52: 347-359. 2016/03/31. DOI:  
660 10.1159/000444526.
- 661 45. Kasa A, Csontos C and Verin AD. Cytoskeletal mechanisms regulating vascular endothelial  
662 barrier function in response to acute lung injury. *Tissue Barriers* 2015; 3: e974448. 2015/04/04. DOI:  
663 10.4161/21688370.2014.974448.
- 664 46. Corre I, Paris F and Huot J. The p38 pathway, a major pleiotropic cascade that transduces  
665 stress and metastatic signals in endothelial cells. *Oncotarget* 2017; 8: 55684-55714. 2017/09/15. DOI:  
666 10.18632/oncotarget.18264.
- 667 47. Lamalice L, Houle F, Jourdan G, et al. Phosphorylation of tyrosine 1214 on VEGFR2 is required  
668 for VEGF-induced activation of Cdc42 upstream of SAPK2/p38. *Oncogene* 2004; 23: 434-445.  
669 2004/01/16. DOI: 10.1038/sj.onc.1207034.
- 670 48. Li J, Miller EJ, Ninomiya-Tsuji J, et al. AMP-activated protein kinase activates p38 mitogen-  
671 activated protein kinase by increasing recruitment of p38 MAPK to TAB1 in the ischemic heart. *Circ*  
672 *Res* 2005; 97: 872-879. 2005/09/24. DOI: 10.1161/01.RES.0000187458.77026.10.
- 673 49. Lanna A, Henson SM, Escors D, et al. The kinase p38 activated by the metabolic regulator  
674 AMPK and scaffold TAB1 drives the senescence of human T cells. *Nat Immunol* 2014; 15: 965-972.  
675 2014/08/26. DOI: 10.1038/ni.2981.
- 676 50. Hardie DG. Targeting an energy sensor to treat diabetes. *Science* 2017; 357: 455-456.  
677 2017/08/05. DOI: 10.1126/science.aao1913.
- 678 51. Kim J, Yang G, Kim Y, et al. AMPK activators: mechanisms of action and physiological activities.  
679 *Exp Mol Med* 2016; 48: e224. 2016/04/02. DOI: 10.1038/emm.2016.16.

680

681

## 682 **FIGURE LEGENDS**

683

684 **Figure 1. VEGF-A and BK induced permeability in cultured brain microvascular**  
685 **ECs.**

686 **(a, b)** Primary rat brain microvascular ECs were grown on permeable Transwell inserts  
687 to confluence and until they reached full electrical barrier (500-800  $\Omega$ .cm<sup>2</sup>). VEGF-A  
688 (a) or BK (b) were added at time 0. Shown are means  $\pm$  SD of normalized resistance  
689 changes (n=3). Significant changes were detected in the short- and long-term, as well

690 as overall responses. **(c)** Changes in the distribution of VE-Cad and Occludin in  
691 response to basal (corresponding to abluminal) stimulation with VEGF-A or BK were  
692 analysed by confocal microscopy in post-confluent primary rat brain microvascular  
693 ECs. Whites arrows indicate the broadening of the VE-Cad staining. Scale bar, 10  $\mu$ M.  
694 **(d-f)** Cryo-immuno-EM of VE-Cad distribution in control (d) and VEGF-A (e) or BK (f)  
695 stimulated human hCMEC/D3 cells. Shown are interendothelial junction areas with the  
696 two adjacent membranes (red arrowheads). White arrowheads point out gold labelled  
697 VE-Cad, which in control cells was found predominantly associated with abutting  
698 plasma membranes (within 20 nm; i.e. the distance expected by the primary and the  
699 secondary bridging Ab). Scale bar, 100 nm. **(g)** Distances of VE-Cad gold particles  
700 from cell-cell junctions determined from three independent preparations as shown in  
701 (d-f). \*\* $p < 0.01$ , \*\*\* $p < 0.001$ .

702

## 703 **Figure 2. Validation of the ex vivo retina model in rats.**

704 **(a, b)** Control retinae were from animals directly perfused fixed with 4% PFA. Ex vivo  
705 retinae were isolated as described, flat mounted and left submerged with Krebs  
706 solutions for 1 h before PFA fixation. Whole mounts were stained for Isolectin B4 (IB4),  
707 claudin-5 (CLDN5) and VE-cad as indicated. **(c-f)** Sulforhodamine-B fluorescent  
708 intensities were recorded in single retinal capillaries. 50 ng/ml VEGF-A (c, d) or 10  $\mu$ M  
709 Bradykinin (BK) (e, f) were applied on top of the retina (abluminal side) at times  
710 indicated. Optionally retinae were preincubated with the VEGFR2-selective antagonist  
711 SU1498 (10  $\mu$ M) for 15 min prior to recording. Mean ( $\pm$  SD) permeability changes  
712 recorded from at least four retinae are shown in (d) and (f). **(g, h)** Ex vivo retinal  
713 explants were incubated with VEGF-A (g) or BK (h) for 2 min, fixed using 4% PFA and  
714 then stained using IB4 (green) and for phospho-p38 (pT180/Y182), phospho-Hsp27

715 (pS82) or phospho-eNOS (pS1177) (magenta). **(i)** Microvessel permeability changes  
716 were recorded in mouse retinae as described in (e, f). **(j)** Mouse retinal explants were  
717 stimulated and stained as described in (g) using phospho-specific antibodies to p38,  
718 HSP27 and eNOS. ns non-significant, \*\*\*p < 0.001. Scale bars, 10  $\mu$ m.

719

### 720 **Figure 3. VEGF-A and Bradykinin induced AMPK phosphorylation.**

721 **(a-c)** Primary brain microvascular ECs were stimulated with VEGF-A from the apical  
722 or basal side for 5 min triggering apically (group I), basally specific (group III) or mixed  
723 (group II) responses (see text or ref 12 for more details) (a). Cells were lysed and  
724 phosphorylation of indicated molecules assessed by phosphoantibody array analysis  
725 (b-c). **(d-g)** brain microvascular ECs (d, f) or ex-vivo rat retinae (e, g) were stimulated  
726 with 50 ng/ml VEGF-A (d, e) or 10  $\mu$ M BK (f, g) for the indicated length of time and  
727 AMPK $\alpha$  phosphorylation (pT172) analysed. Representative results and quantification  
728 of AMPK $\alpha$  activation from three independent experiments are shown as normalised  
729 means  $\pm$  SD. \*p < 0.05, \*\*p < 0.01, \*\*\*p < 0.001.

730

### 731 **Figure 4. AMPK mediated VEGF-A/Bradykinin-induced permeability.**

732 **(a-f)** Rat ex-vivo retinae were preincubated with or without Compound-C (CC, 10  $\mu$ M)  
733 for 15 minutes. 10 ng/ml VEGF-A (a, b) or 10  $\mu$ M BK (c, d) were then applied to the  
734 top of the retina and changes in permeability were recorded. Alternatively (e, f), retinae  
735 were immunostained using IB4 (green) and anti-phospho-p38, -HSP27 or -eNOS  
736 (magenta) as detailed in Figure 2. **(g-l)** AMPK $\alpha$  specific siRNA or scrambled control  
737 was injected into the vitreous of mouse eyes. After 48 h retinae were isolated, lysed  
738 and subjected to immunoblotting as indicated (g). Shown in (h) is the densitometric  
739 quantification of 3 independent experiments as shown in (g). Alternatively, after 48 h

740 retinae were prepared for ex vivo permeability measurements and stimulated using  
741 VEGF-A (50 ng/ml) (i, j) or BK (10  $\mu$ M) (k, l). Note that neither PIF induced any  
742 permeability in the knocked down ex-vivo retina. Representative results and  
743 quantifications (normalized mean  $\pm$  SD) from three independent experiments are  
744 shown. \*\*p < 0.01, \*\*\*p < 0.001. Scale bars, 10  $\mu$ m.

745

746 **Figure 5. Stimulation of AMPK induced permeability in the ex vivo retina.**

747 **(a-d)** Ex vivo preparations were stimulated with the two different AMPK activators  
748 A769662 (10  $\mu$ M) and AICAR (10  $\mu$ M). Both agonists induced strong and immediate  
749 permeability in the ex vivo retinal microvessels. Mean ( $\pm$  SD) permeability changes  
750 recorded from at least four retinae are shown in (b, d). **(e)** Ex vivo retinae were  
751 stimulated as in (a-d) and after 2 min fixed using 4% PFA and then immunostained  
752 using IB4 (green) and or anti-phospho-p38, -HSP27 or -eNOS (magenta) as detailed  
753 in Figure 2 (magenta). \*p < 0.05. Scale bars, 10  $\mu$ m.

754

755 **Figure 6. VEGF-A- and Bradykinin-induced permeability requires Ca<sup>2+</sup>, CaMKK,**  
756 **p38 and eNOS.**

757 **(a-e)** Ex vivo retinae were preincubated with 20  $\mu$ M BAPTA (Ca<sup>2+</sup> chelator) (a, e as  
758 indicated), 10  $\mu$ M STO-609 (STO, CaMKK inhibitor) (b, e as indicated), 10  $\mu$ M L-NAME  
759 (NOS inhibitor) (c, e as indicated), or 10  $\mu$ M SB202190 (SB, p38 inhibitor) (d, e as  
760 indicated) for 15 minutes. Then VEGF-A (50 ng/ml) was applied to the top of the retina  
761 (abluminal side) and changes in microvessel permeability were recorded as described  
762 in Figure 2. Alternatively (e), retinae were fixed after 2 min using 4 % PFA and then  
763 immunostained with IB4 (green) and for phosphorylation of p38, HSP27 and eNOS  
764 (magenta). **(f-j)** As in panels (a-e), except that ex vivo retinae were stimulated with BK

765 (10  $\mu$ M). Representative results and quantifications (mean  $\pm$  SD) from four  
766 independent experiments are shown. \* $p < 0.05$ , \*\* $p < 0.01$ , \*\*\* $p < 0.001$ . Scale bars,  
767 10  $\mu$ m.

768

769 **Figure 7. VEGF-A and Bradykinin induced VE-Cadherin phosphorylation.**

770 **(a)** Ex vivo retinae were preincubated with SU1498 (10  $\mu$ M), or BAPTA (20  $\mu$ M) or  
771 STO (10  $\mu$ M) and treated with VEGF-A and Bradykinin for 2 min. Retinae were then  
772 fixed with 4% PFA and immunostained for phospho-AMPK $\alpha$  (magenta) and with IB4  
773 (green). **(b)** Ex vivo retinae were preincubated with compound C (10  $\mu$ M), or L-NAME  
774 (10  $\mu$ M) or SB202190 (10  $\mu$ M), treated with VEGF-A and Bradykinin for 2 min and  
775 immunostained for phosphorylated VE-cad (using anti-pY685-VEC) (magenta) and  
776 with IB4 (green). **(c)** Proposed signalling networks in the ex-vivo retinal  
777 microvasculature downstream of VEGF-A and Bradykinin. Scale bars, 10  $\mu$ m.

778

779 **Supplemental Figure 1. Properties of the ex vivo retina model.**

780 **(a-b)** Selected frames, pseudocoloured in (b), of time-resolved recordings of a  
781 Sulforhodamine-B-filled rat capillary before and after the addition of 50 ng/ml VEGF-  
782 A, illustrating the rapid loss of fluorophore from the lumen of the vessel. The red box  
783 exemplifies a typical r.o.i used for intensity measurement. Scale bars, 10  $\mu$ m. **(c-g)**  
784 CLDN5 siRNA was injected into mouse eyes. 48 h later CLDN5 levels were analysed  
785 by immunoblots of retinal lysates (c-d) or by wholemout immunochemical staining  
786 (e). Scale bar, 100  $\mu$ m. Alternatively, permeability of 4 KDa Rhodamine was measured  
787 in ex vivo retinae from CLDN5 siRNA or control injected eyes (f-g). \*\* $p < 0.01$ , \*\*\* $p <$   
788 0.001.

789

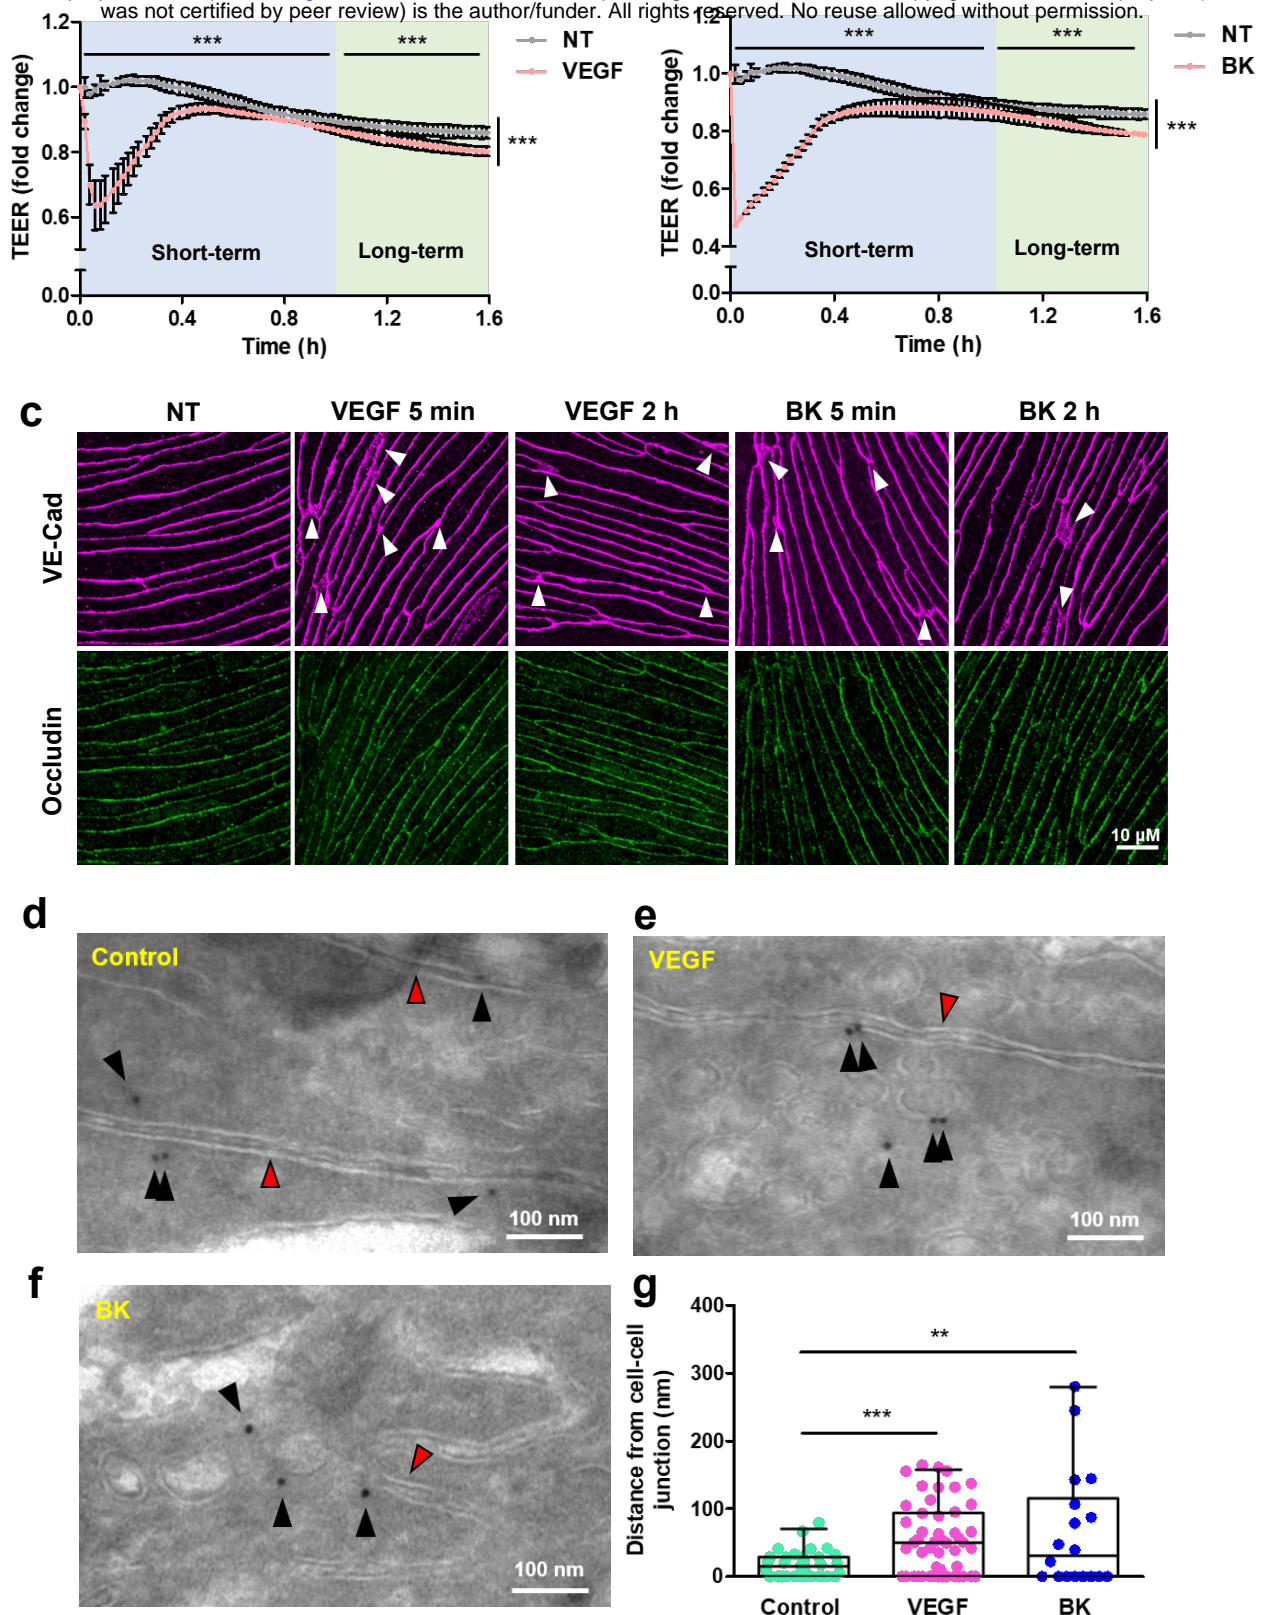

**Figure 1. VEGF and BK induced permeability in cultured brain MVECs.**

(a, b) Primary rat brain microvascular ECs were grown on permeable Transwell inserts to confluence and until they reached full electrical barrier (500-800  $\Omega$ .cm<sup>2</sup>). VEGF-A (a) or BK (b) were added at time 0. Shown are means  $\pm$  SD of normalized resistance changes (n=3). Significant changes were detected in the short- and long-term, as well as overall responses. (c) Changes in the distribution of VE-Cad and Occludin in response to basal (corresponding to abluminal) stimulation with VEGF-A or BK were analysed by confocal microscopy in post-confluent primary rat brain microvascular ECs. Whites arrows indicate the broadening of the VE-Cad staining. Scale bar: 10  $\mu$ m. (d-f) Cryo-immuno-EM of VE-Cad distribution in control (d) and VEGF-A (e) or BK (f) stimulated human hCMEC/D3 cells. Shown are interendothelial junction areas with the two adjacent membranes (red arrowheads). White arrowheads point out gold labelled VE-Cad, which in control cells was found predominantly associated with abutting plasma membranes (within 20 nm; i.e. the distance expected by the primary and the secondary bridging Ab). Scale bar: 100 nm. (g) Distances of VE-Cad gold particles from cell-cell junctions for determined from three independent preparations as shown in (d-f). \*\*p < 0.01, \*\*\*p < 0.001.

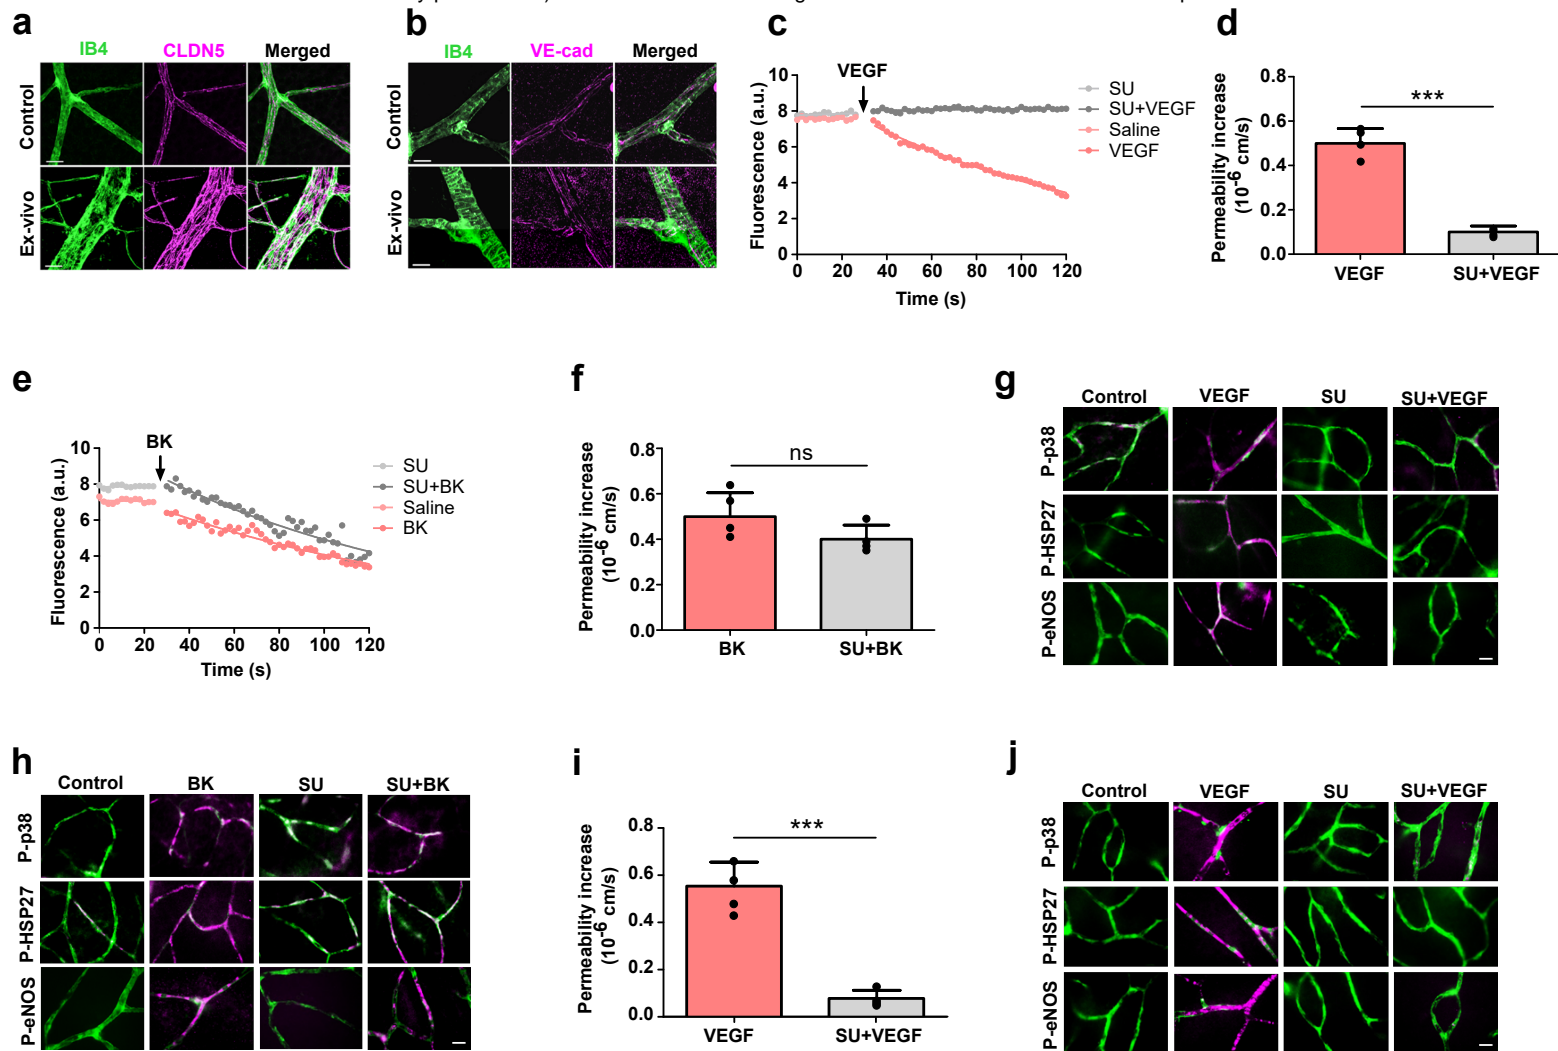

**Figure 2. Validation of the ex vivo retina model in rats.**

(a, b) Control retinæ were from animals directly perfused fixed with 4% PFA. Ex vivo retinæ were isolated as described, flat mounted and left submerged with Krebs solutions for 1 h before PFA fixation. Whole mounts were stained for Isolectin B4 (IB4), claudin-5 (CLDN5) and VE-cad as indicated. (c-f) Sulforhodamine-B fluorescent intensities were recorded in single retinal capillaries. 50 ng/ml VEGF-A (c, d) or 10  $\mu$ M Bradykinin (BK) (e, f) were applied on top of the retina (abluminal side) at times indicated. Optionally retinæ were preincubated with the VEGFR2-selective antagonist SU1498 (10  $\mu$ M) for 15 min prior to recording. Mean ( $\pm$  SD) permeability changes recorded from at least four retinæ are shown in (d) and (f). (g, h) Ex vivo retinal explants were incubated with VEGF-A (g) or BK (h) for 2 min, fixed using 4% PFA and then stained using IB4 (green) and for phospho-p38 (pT180/Y182), phospho-Hsp27 (pS82) or phospho-eNOS (pS1177) (magenta). (i) Microvessel permeability changes were recorded in mouse retinæ as described in (e, f). (j) Mouse retinal explants were stimulated and stained as described in (g) using phospho-specific antibodies to p38, HSP27 and eNOS. ns non-significant, \*\*\*p < 0.001. Scale bars, 10  $\mu$ m.

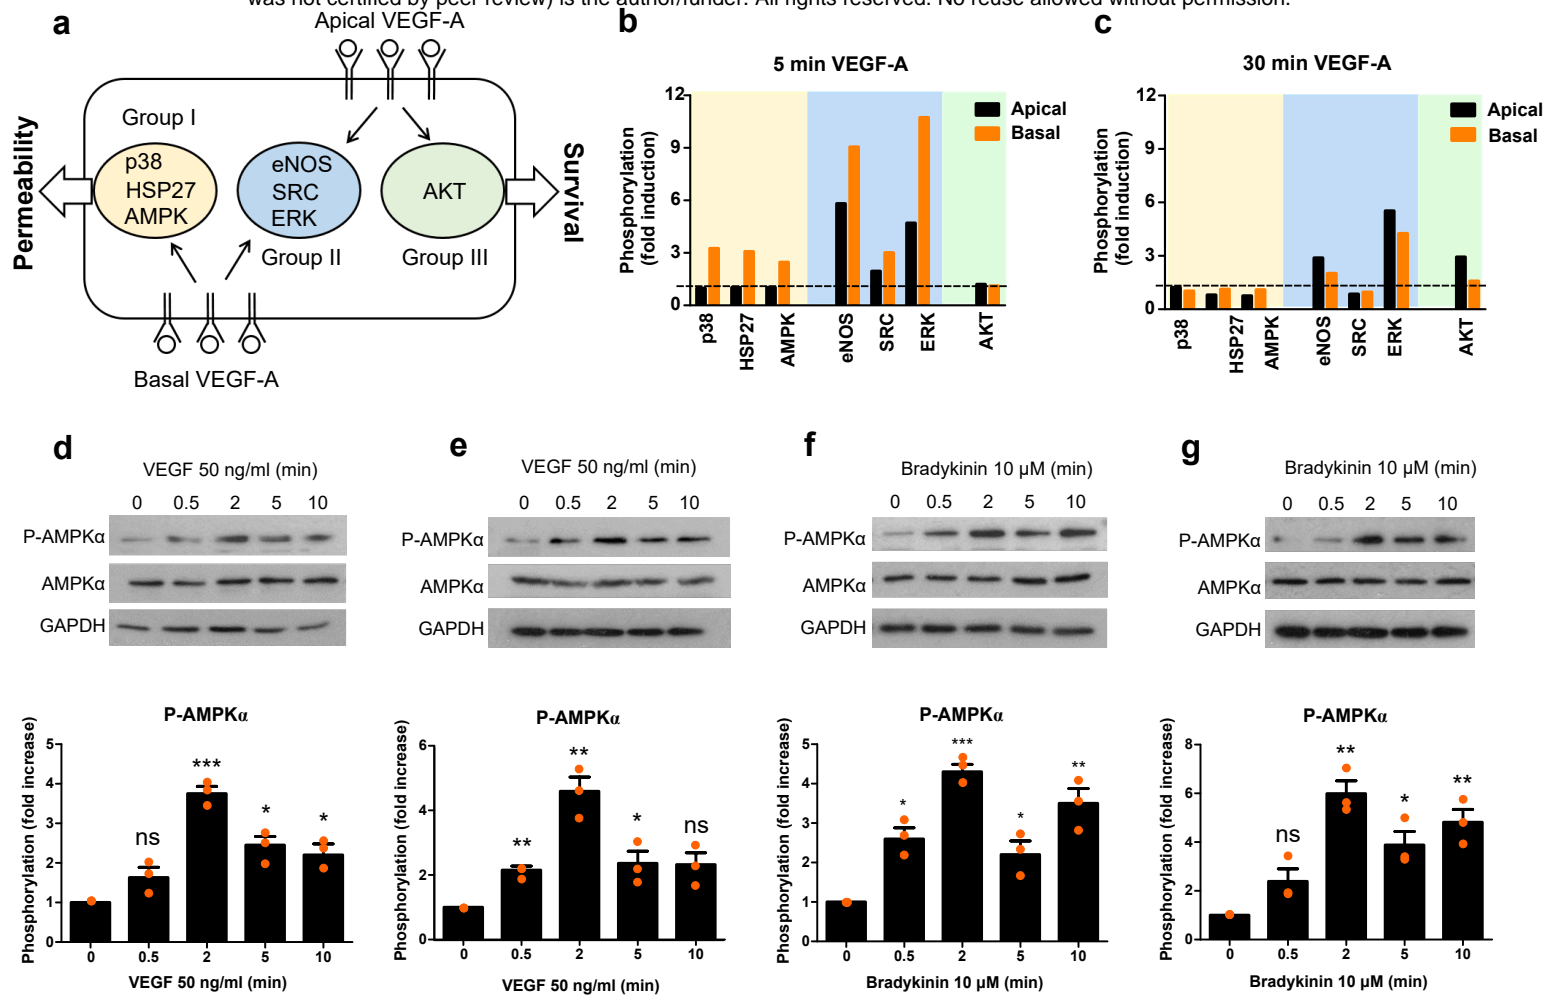

**Figure 3. VEGF-A and Bradykinin induced AMPK phosphorylation.**

(a-c) Primary brain microvascular ECs were stimulated with VEGF-A from the apical or basal side for 5 min triggering apically (group I), basally specific (group III) or mixed (group II) responses (see text or ref 12 for more details) (a). Cells were lysed and phosphorylation of indicated molecules assessed by phosphoantibody array analysis (b-c). (d-g) brain microvascular ECs (d, f) or ex-vivo rat retinae (e, g) were stimulated with 50 ng/ml VEGF-A (d, e) or 10 μM BK (f, g) for the indicated length of time and AMPKα phosphorylation (pT172) analysed. Representative results and quantification of AMPKα activation from three independent experiments are shown as normalised means ± SD. \*p < 0.05, \*\*p < 0.01, \*\*\*p < 0.001.



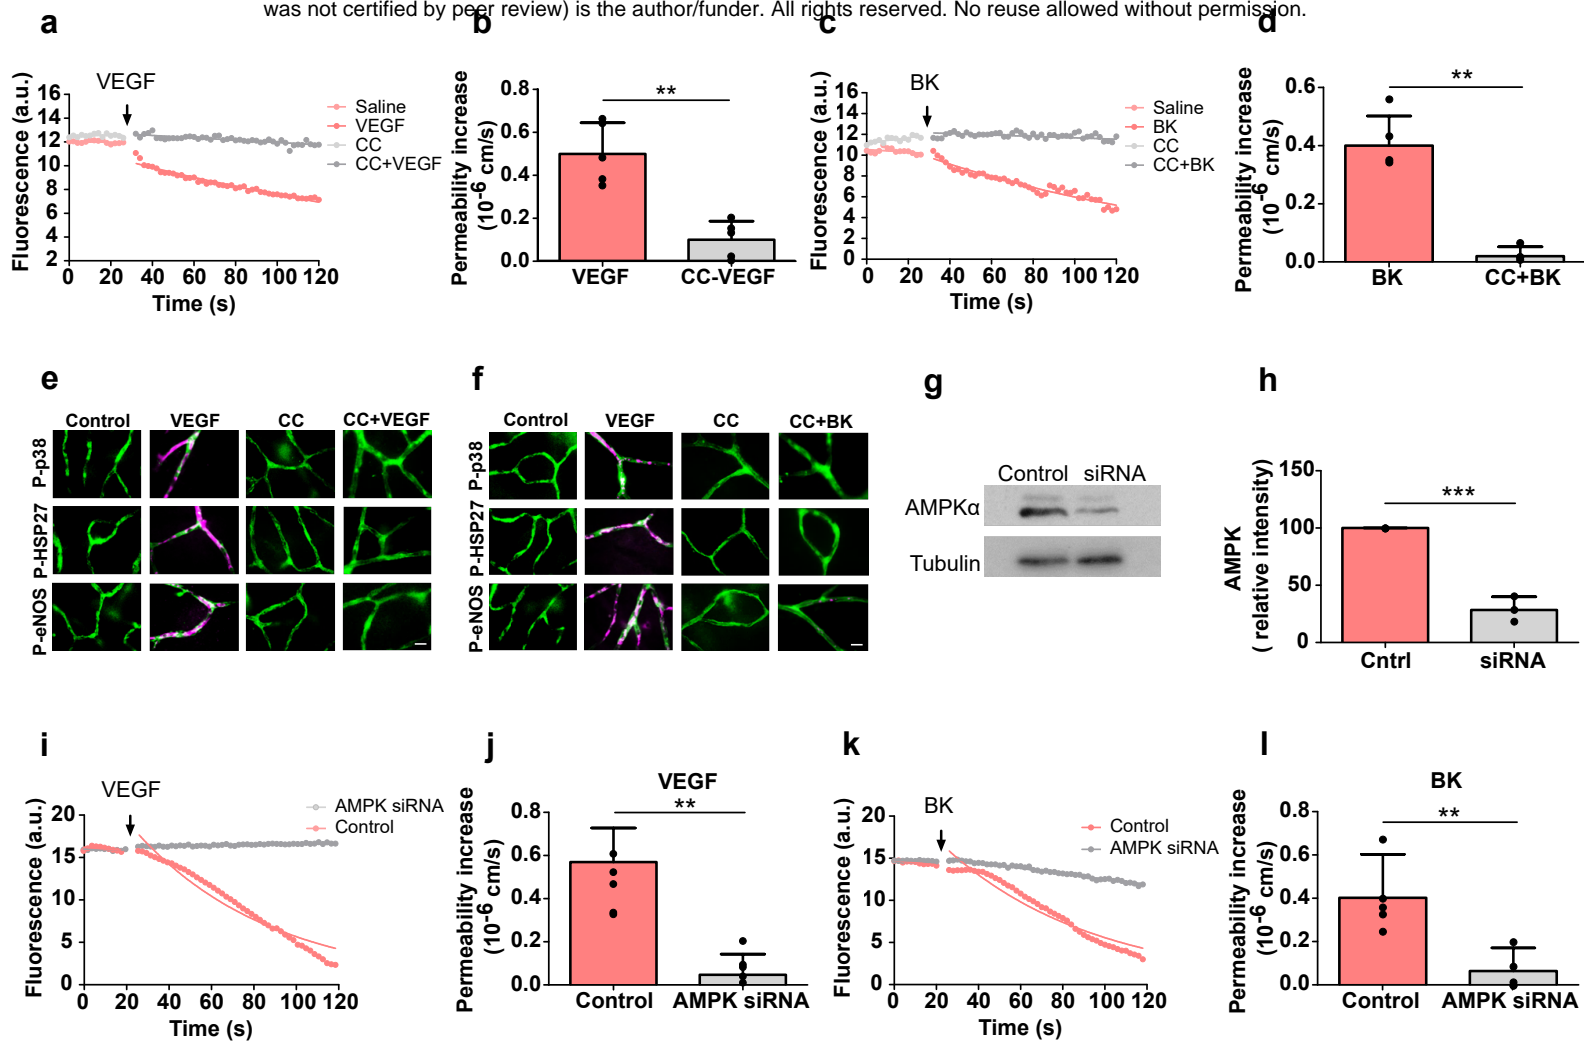

#### Figure 4. AMPK mediated VEGF-A/Bradykinin-induced permeability.

(a-f) Rat ex-vivo retinæ were preincubated with or without Compound-C (CC, 10  $\mu$ M) for 15 minutes. 10 ng/ml VEGF-A (a, b) or 10  $\mu$ M BK (c, d) were then applied to the top of the retina and changes in permeability were recorded. Alternatively (e, f), retinæ were immunostained using IB4 (green) and anti-phospho-p38, -HSP27 or -eNOS (magenta) as detailed in Figure 2. (g-l) AMPK $\alpha$  specific siRNA or scrambled control was injected into the vitreous of mouse eyes. After 48 h retinæ were isolated, lysed and subjected to immunoblotting as indicated (g). Shown in (h) is the densitometric quantification of 3 independent experiments as shown in (g). Alternatively, after 48 h retinæ were prepared for ex vivo permeability measurements and stimulated using VEGF-A (50 ng/ml) (i, j) or BK (10  $\mu$ M) (k, l). Note that neither PIF induced any permeability in the knocked down ex-vivo retina. Representative results and quantifications (normalized mean  $\pm$  SD) from three independent experiments are shown. \*\* $p < 0.01$ , \*\*\* $p < 0.001$ . Scale bars, 10  $\mu$ m.

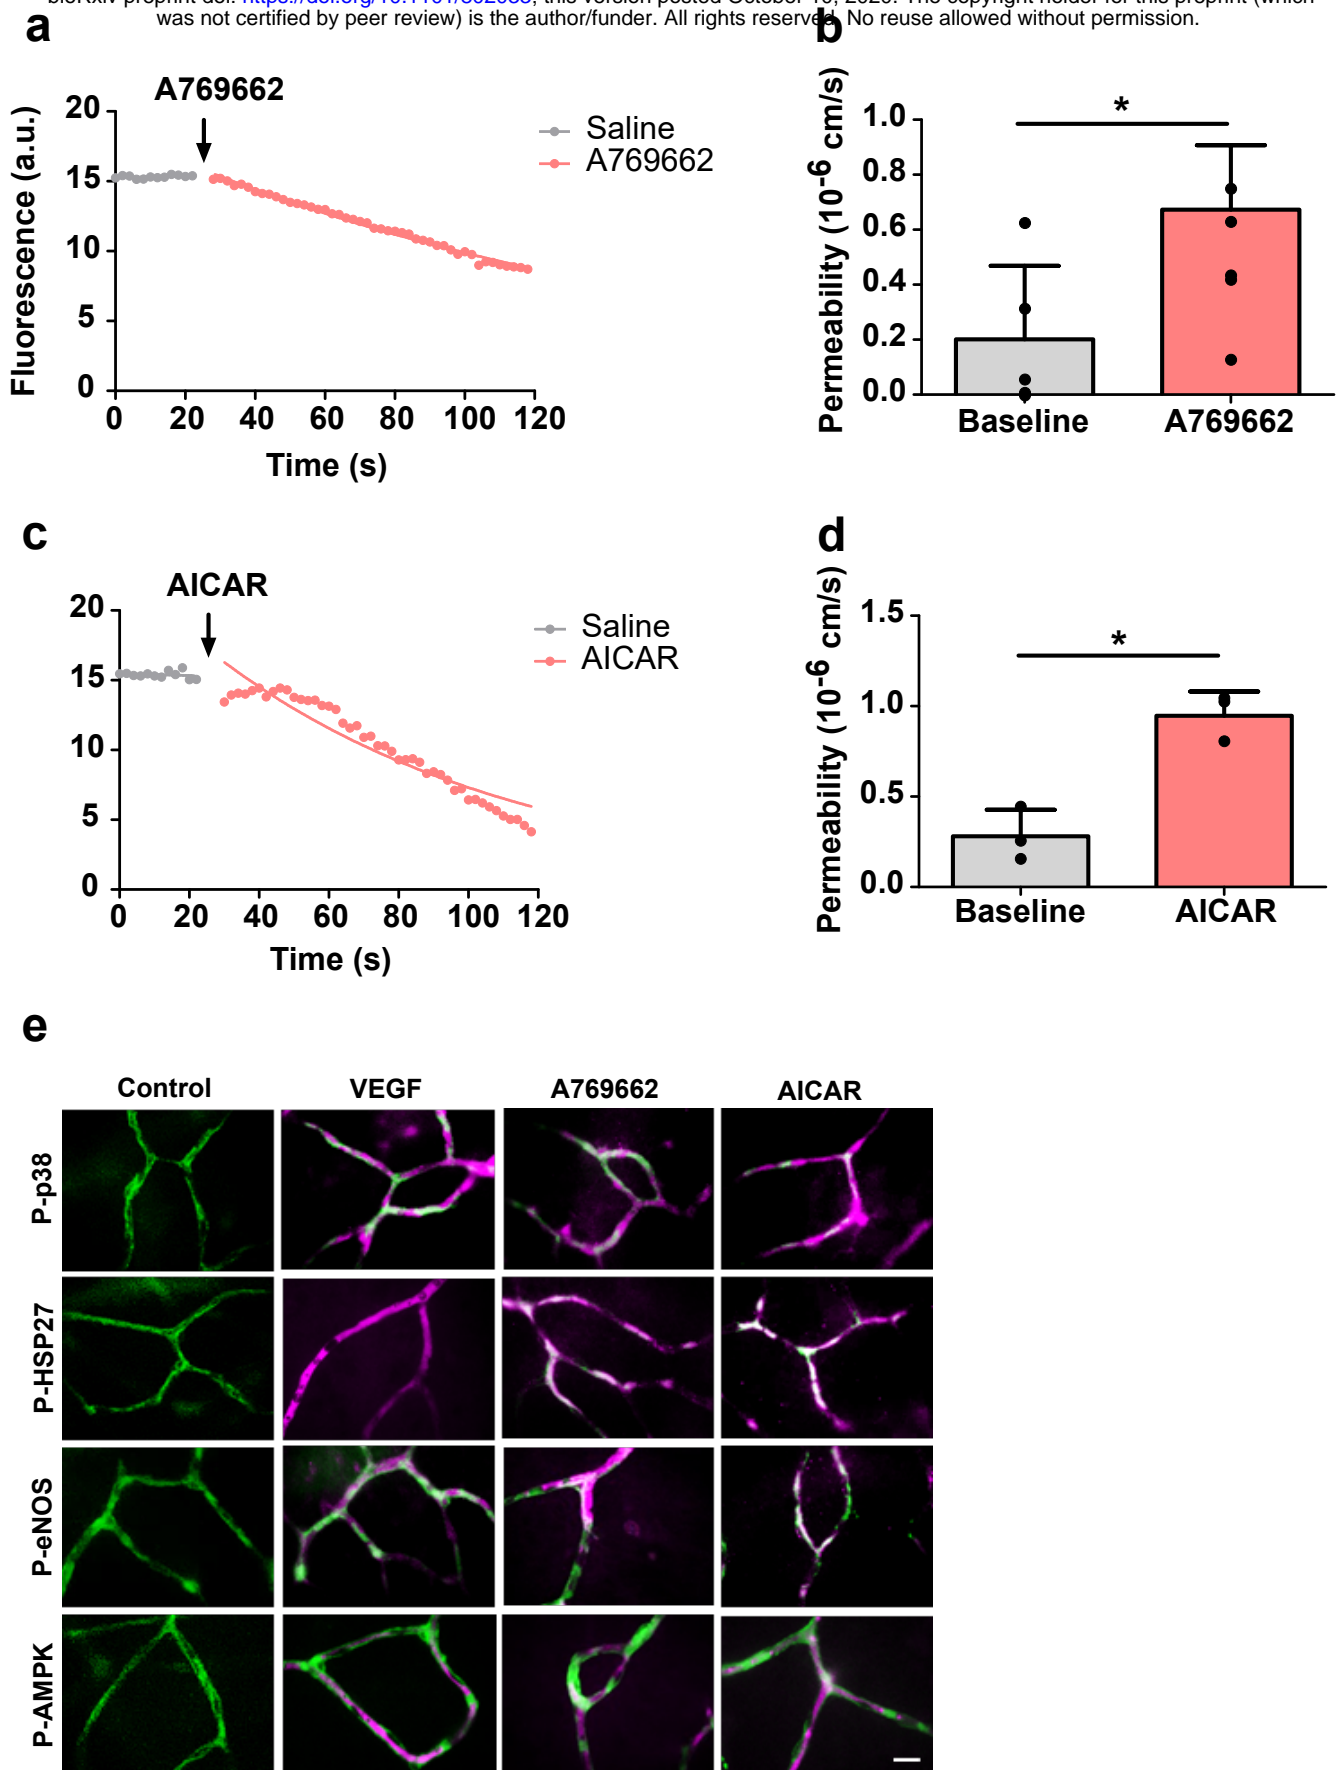

**Figure 5. Stimulation of AMPK induced permeability in the ex-vivo retina.**

(a-d) Ex vivo preparations were stimulated with the two different AMPK activators A769662 (10  $\mu$ M) and AICAR (10  $\mu$ M). Both agonists induced strong and immediate permeability in the ex vivo retinal microvessels. Mean ( $\pm$  SD) permeability changes recorded from at least four retinae are shown in (b, d). (e) Ex vivo retinae were stimulated as in (a-d) and after 2 min fixed using 4% PFA and then immunostained using IB4 (green) and or anti-phospho-p38, -HSP27 or -eNOS (magenta) as detailed in Figure 2 (magenta). \* $p < 0.05$ . Scale bars, 10  $\mu$ m.

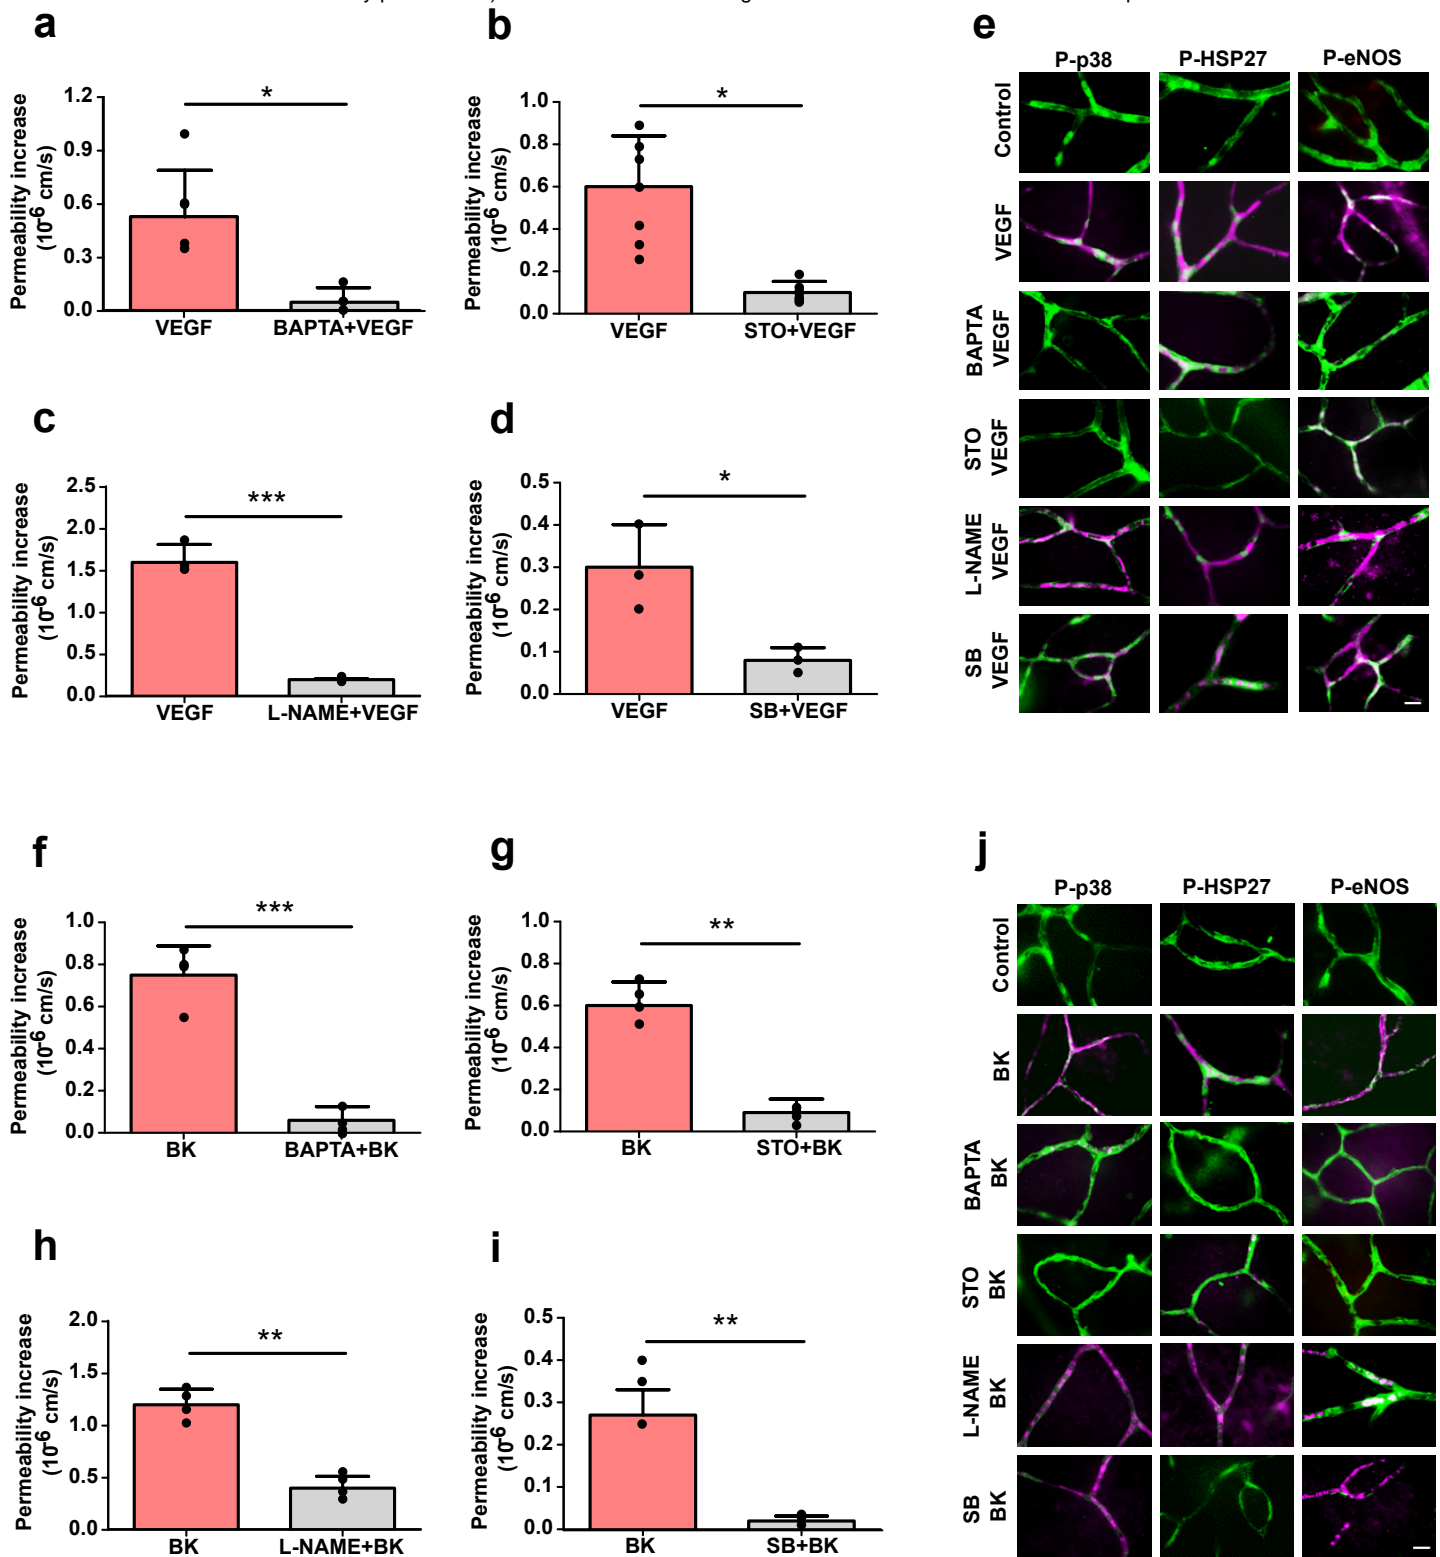

**Figure 6. VEGF-A- and Bradykinin-induced permeability requires  $Ca^{2+}$ , CaMKK, p38 and eNOS.**

(a-e) Ex vivo retinæ were preincubated with 20  $\mu$ M BAPTA ( $Ca^{2+}$  chelator) (a, e as indicated), 10  $\mu$ M STO-609 (STO, CaMKK inhibitor) (b, e as indicated), 10  $\mu$ M L-NAME (NOS inhibitor) (c, e as indicated), or 10  $\mu$ M SB202190 (SB, p38 inhibitor) (d, e as indicated) for 15 minutes. Then VEGF-A (50 ng/ml) was applied to the top of the retina (abluminal side) and changes in microvessel permeability were recorded as described in Figure 2. Alternatively (e), retinæ were fixed after 2 min using 4 % PFA and then immunostained with IB4 (green) and for phosphorylation of p38, HSP27 and eNOS (magenta). (f-j) As in panels (a-e), except that ex vivo retinæ were stimulated with BK (10  $\mu$ M). Representative results and quantifications (mean  $\pm$  SD) from four independent experiments are shown. \* $p < 0.05$ , \*\* $p < 0.01$ , \*\*\* $p < 0.001$ . Scale bars, 10  $\mu$ m.

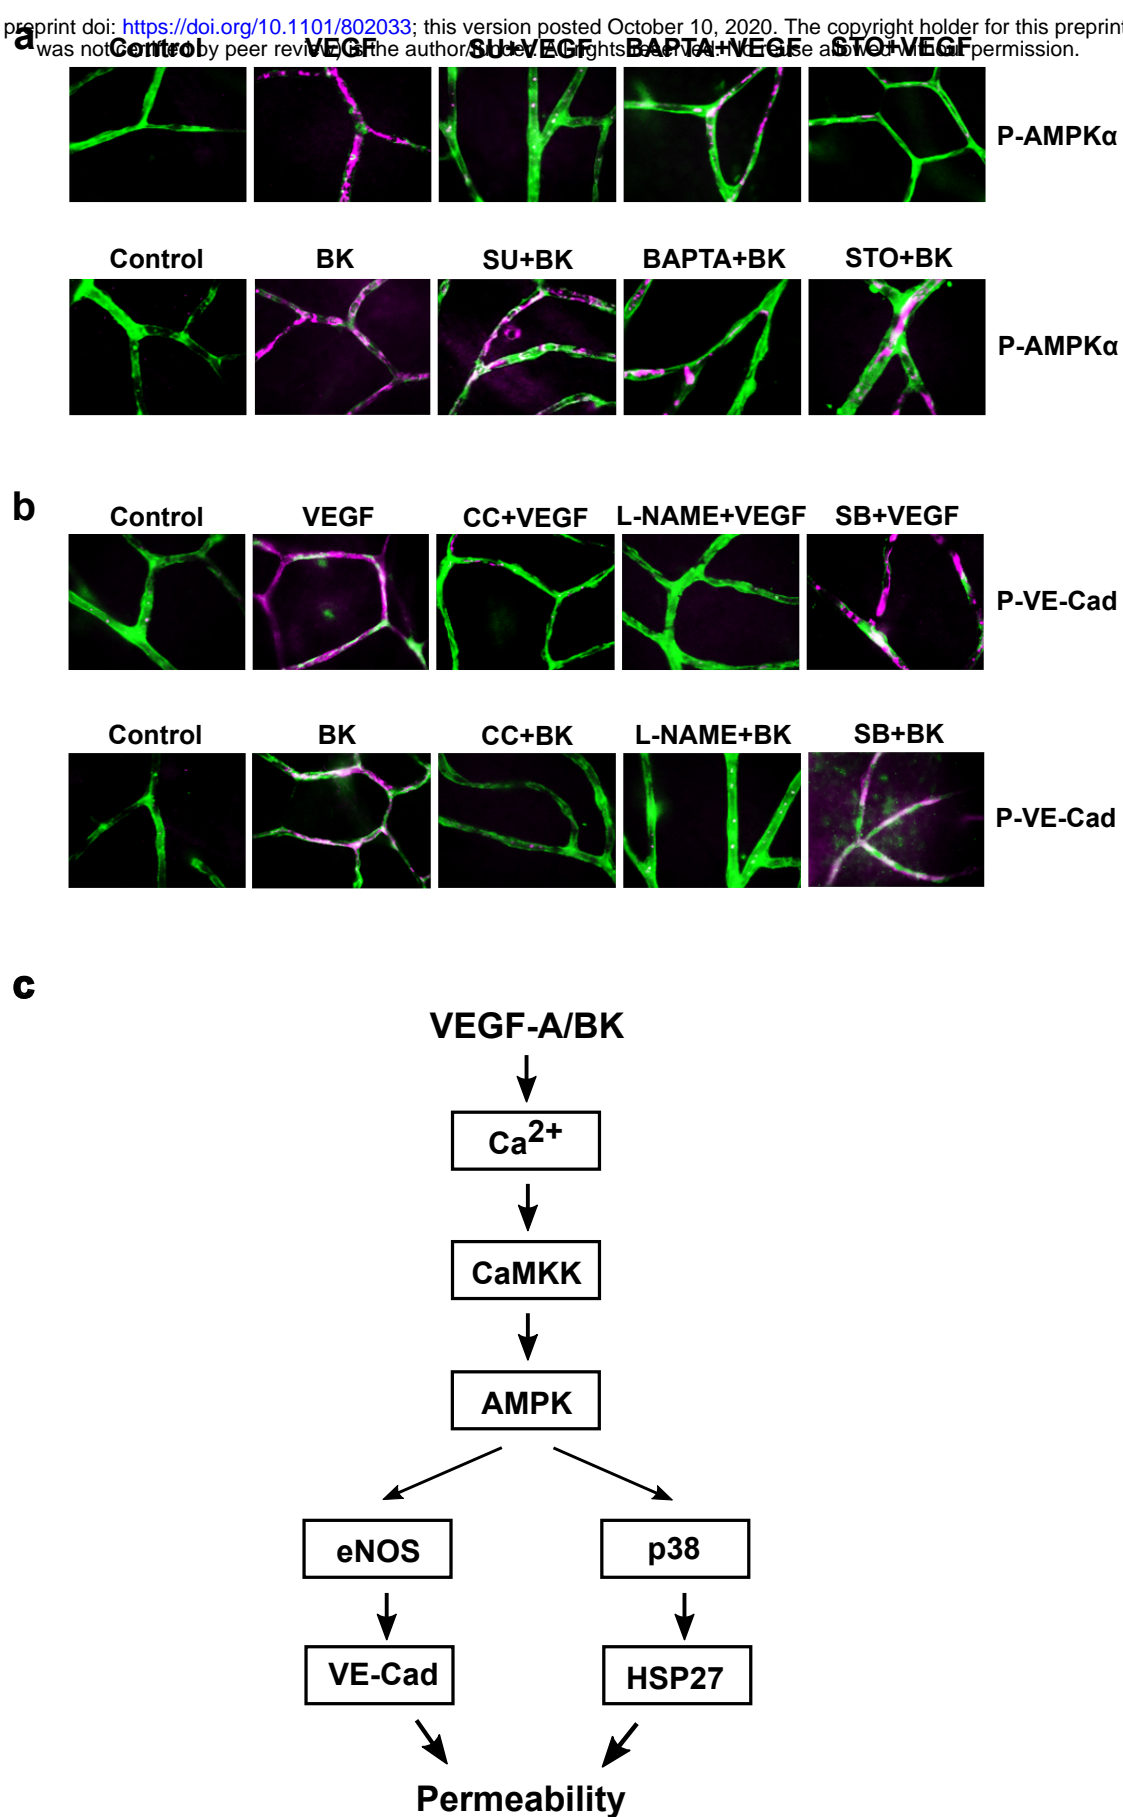

**Figure 7. VEGF-A and Bradykinin induced VE-Cadherin phosphorylation.**

**(a)** Ex vivo retinae were preincubated with SU1498 (10  $\mu$ M), or BAPTA (20  $\mu$ M) or STO (10  $\mu$ M) and treated with VEGF-A and Bradykinin for 2 min. Retinae were then fixed with 4% PFA and immunostained for phospho-AMPK $\alpha$  (magenta) and with IB4 (green). **(b)** Ex vivo retinae were preincubated with compound C (10  $\mu$ M), or L-NAME (10  $\mu$ M) or SB202190 (10  $\mu$ M), treated with VEGF-A and Bradykinin for 2 min and immunostained for phosphorylated VE-cad (using anti-pY685-VEC) (magenta) and with IB4 (green). **(c)** Proposed signalling networks in the ex-vivo retinal microvasculature downstream of VEGF-A and Bradykinin. Scale bars, 10  $\mu$ m.

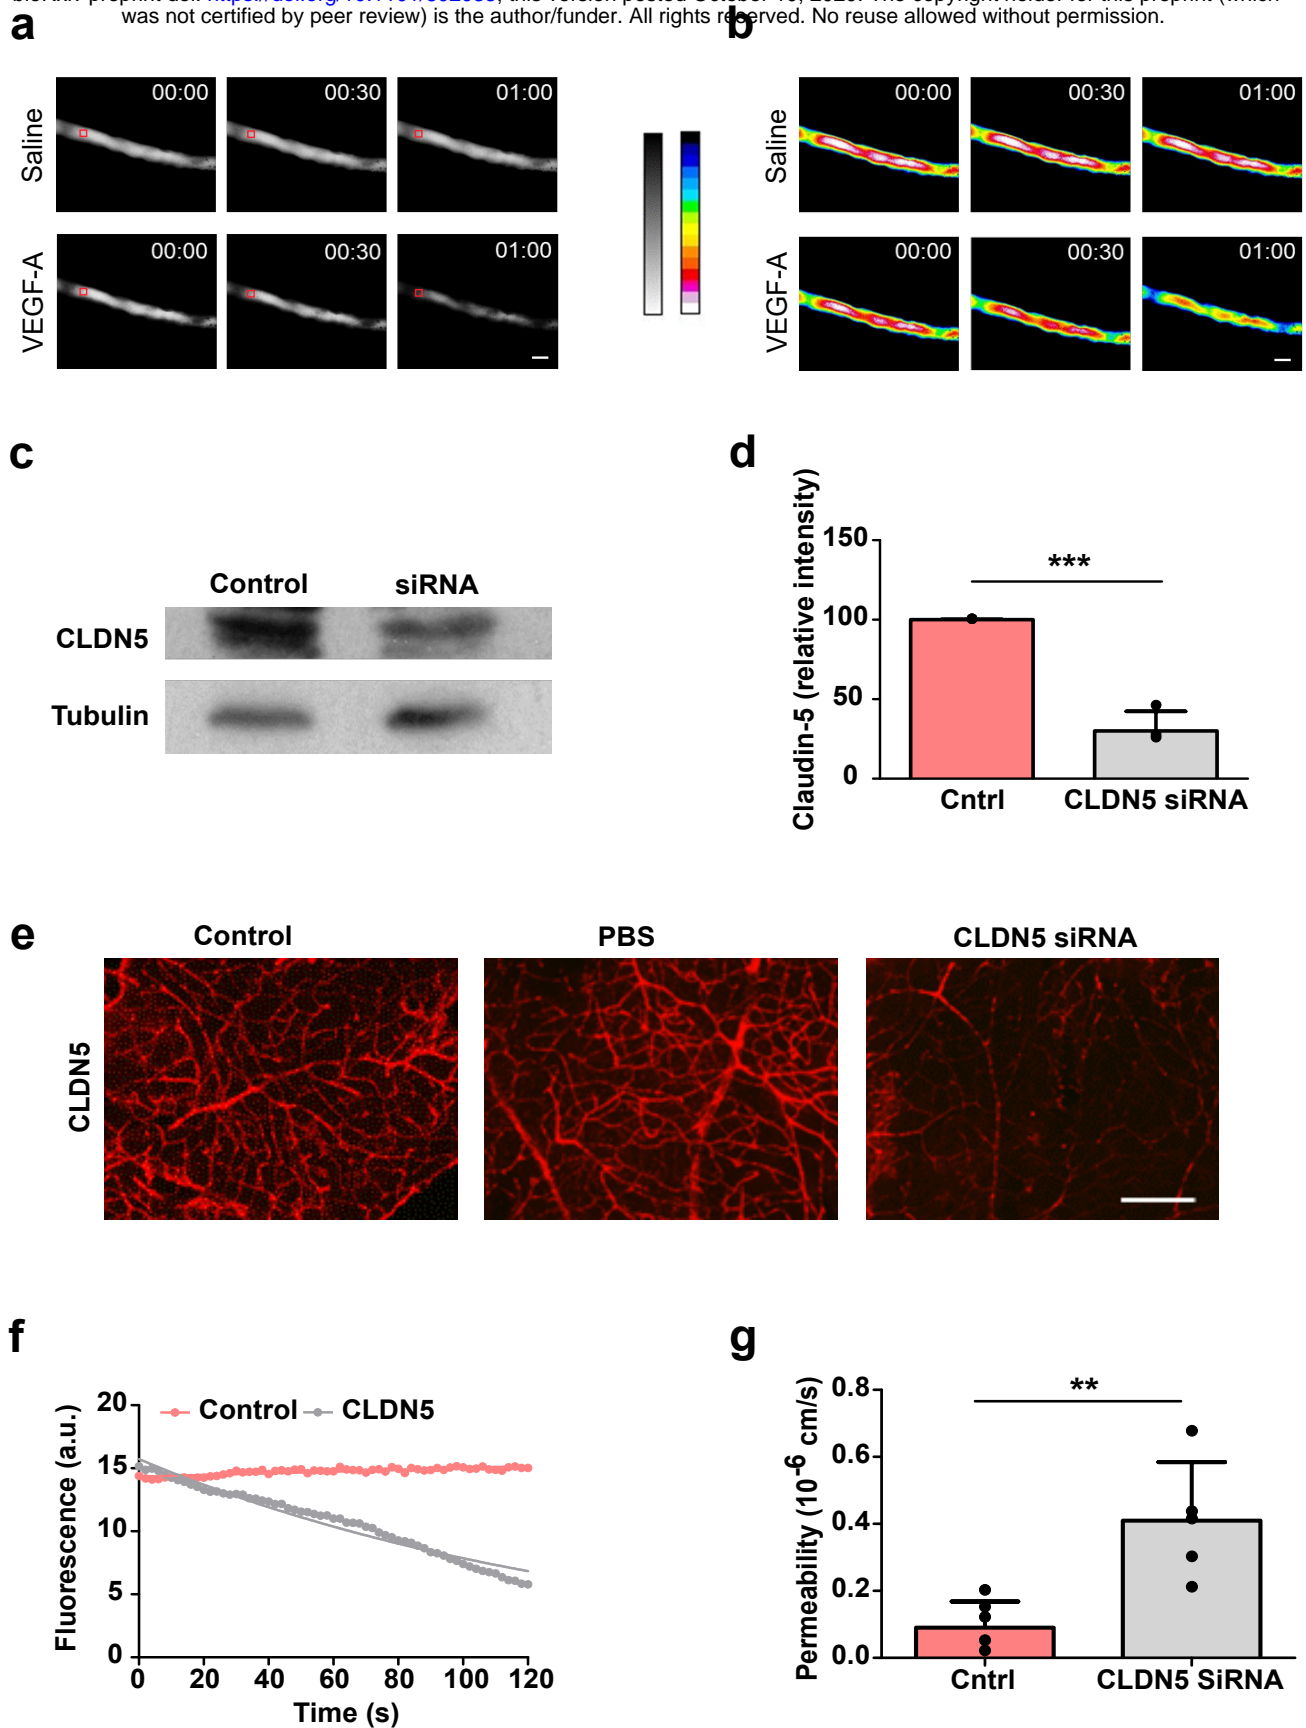

### Supplemental Figure 1. Properties of the ex-vivo retina model.

(a-b) Selected frames, pseudocoloured in (b), of time-resolved recordings of a Sulforhodamine-B-filled rat capillary before and after the addition of 50 ng/ml VEGF-A, illustrating the rapid loss of fluorophore from the lumen of the vessel. The red box exemplifies a typical r.o.i used for intensity measurement. Scale bars, 10  $\mu$ m. (c-g) CLDN5 siRNA was injected into mouse eyes. 48 h later CLDN5 levels were analysed by immunoblots of retinal lysates (c-d) or by wholemount immunochemical staining (e). Scale bar, 100  $\mu$ m. Alternatively, permeability of 4 KDa Rhodamine was measured in ex vivo retinæ from CLDN5 siRNA or control injected eyes (f-g). \*\* $p < 0.01$ , \*\*\* $p < 0.001$ .
